# Supplementary material for: Reconstitution of pluripotency from mouse fibroblast through Sall4 overexpression
Source: PubMed Central journal article supplement (PMC11686038; doi:10.1038/s41467-024-54924-5), 2024-12-30
Supplement: 41467_2024_54924_MOESM1_ESM.pdf [file 41467_2024_54924_MOESM1_ESM.pdf]

# Supplementary Information

## Reconstitution of Pluripotency from Mouse Fibroblast through *Sall4* Overexpression

**Supplementary information includes:**

Supplementary Figure 1-16.

Supplementary Table 1. List of primer sequences for PCR, qRT-PCR and shRNA.

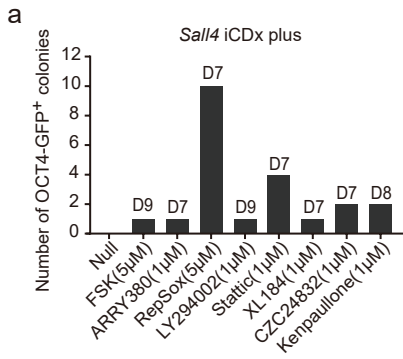

**b**

| Small molecules | Targets                    |
|-----------------|----------------------------|
| Forskolin       | cAMP agonist               |
| ARRY380         | EGFR inhibitor             |
| RepSox          | TGFβR-1/ALK5 inhibitor     |
| LY294002        | PI3K inhibitor             |
| Stattic         | STAT3 inhibitor            |
| XL184           | EGFR inhibitor             |
| CZC24832        | PI3Kγ inhibitor            |
| Kenpaullone     | CDK1/2/5, GSK-3β inhibitor |

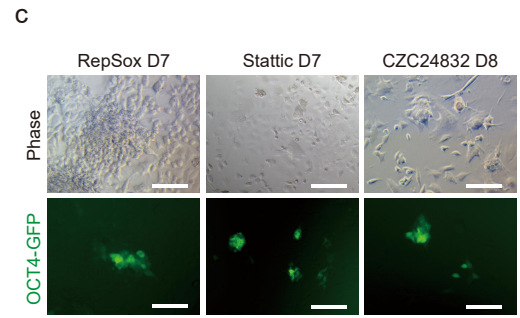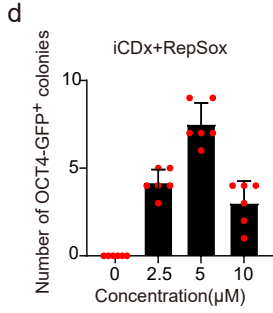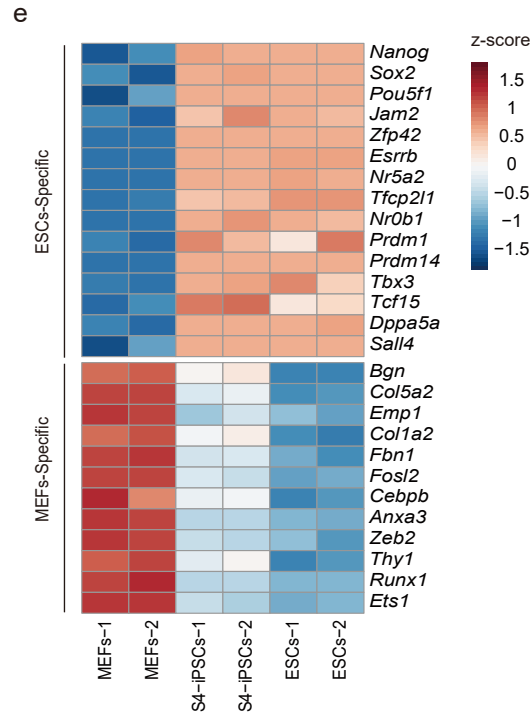

**g**

| components        | iCD1 | iCD4 |
|-------------------|------|------|
| DMEM              | ✓    | ✓    |
| N2                | ✓    | ✓    |
| B27               | ✓    | ✓    |
| Sodium Pyruvate   | ✗    | ✓    |
| GlutaMax          | ✓    | ✓    |
| NEAA              | ✓    | ✓    |
| 2-mercaptoethanol | ✓    | ✓    |
| Vitamin C         | ✓    | ✓    |
| TV                | ✓    | ✓    |
| bFGF              | ✓    | ✓    |
| LIF               | ✓    | ✓    |
| Y27632            | ✗    | ✓    |
| GSK-LSD1          | ✗    | ✓    |
| SGC0946           | ✗    | ✓    |
| CHIR99021         | ✓    | ✓    |
| Repsox            | ✗    | ✓    |
| LIcI              | ✓    | ✗    |

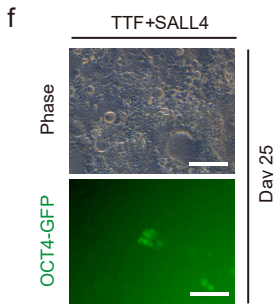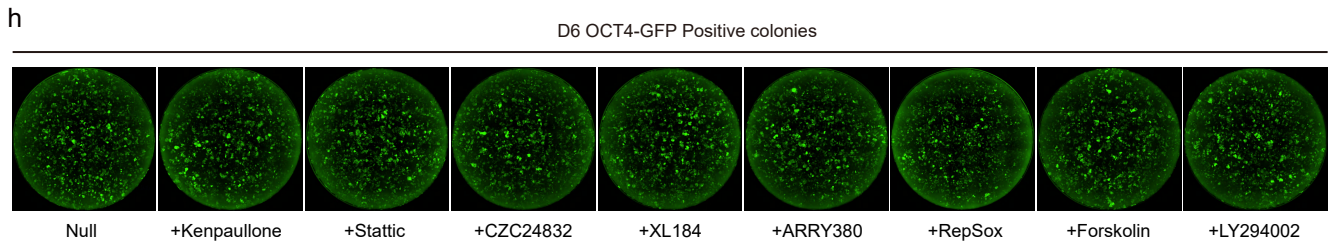

iCD4 (remove RepSox) +

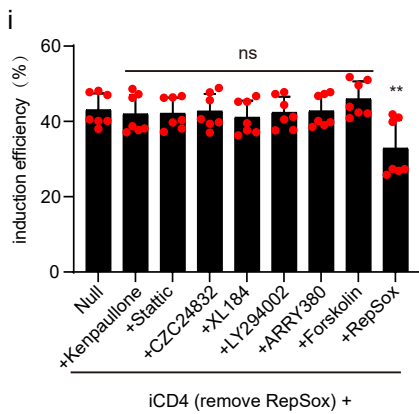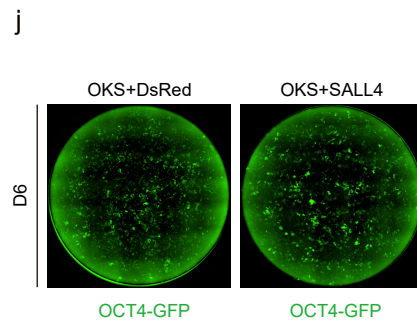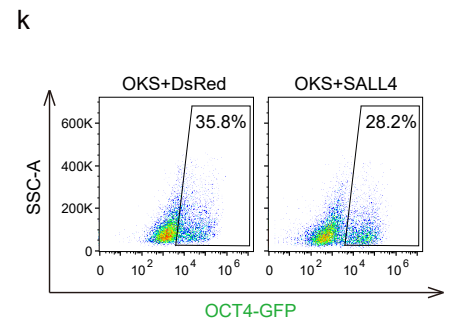

**Supplementary Fig.1 Small molecule screening for the determination of induction medium that could driving SALL4 - mediated iPSCs reprogramming successfully**

**a.** The number of OCT4-GFP<sup>+</sup> colonies on day 10 from  $1.5 \times 10^4$  MEFs infected with SALL4 in iCDx plus small molecular compounds. n = 1 well from 1 independent experiments. **b.** Targets of the small molecular compounds that could driving SALL4-iPSCs production. **c.** Morphological diagram of the small molecular induced SALL4-iPSCs. Scale bars, 200 $\mu$ m. The experiments were repeated one times. **d.** The dosage effect of RepSox in driving SALL4-iPSCs reprogramming. Data are mean  $\pm$  SD; n = 6 well from 3 independent experiments. **e.** Heatmaps for the expression of ESCs specific genes and MEFs specific genes for SALL4-iPSCs, ESCs and MEFs in RNA-seq data. **f.** The morphology of OCT4-GFP<sup>+</sup> colonies induced by SALL4 from TTFs. Scale bars, 200 $\mu$ m. The experiments were repeated independently three times with similar results. **g.** The components of iCD1 medium and iCD4 medium. **h.** OCT4-GFP<sup>+</sup> colonies collects from the whole wells in 24 well plate shows the OKS-mediated iPSCs induction efficiency using iCD4(remove Repsox) medium added with small molecules in Supplementary Fig.1b. The experiments were repeated independently three times with similar results. **i.** The histogram shows the iPSCs induction efficiency in Supplementary Fig.1h. Data are mean  $\pm$  SD. n =6 well from 3 independent experiments. \*\*p=0.0093. **j.** OCT4-GFP<sup>+</sup> colonies collects from the whole wells in 24 well plate shows the OKS+SALL4-mediated iPSCs induction efficiency using iCD4 medium at day6. The experiments were repeated independently three times with similar results. **k.** Flow cytometry was used to analyze the iPSCs induction efficiency in Supplementary Fig.1j.

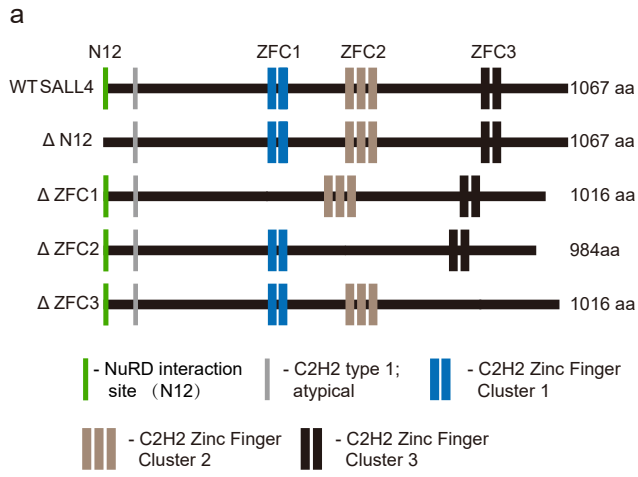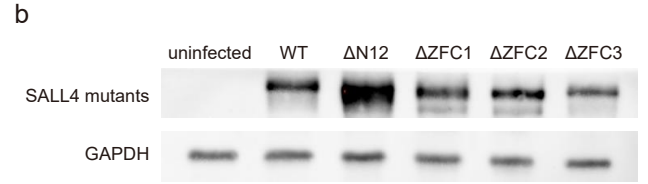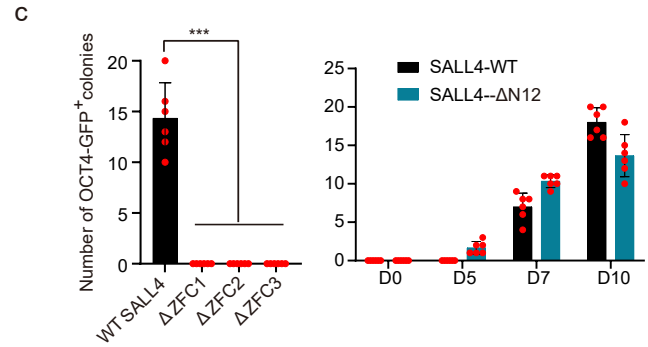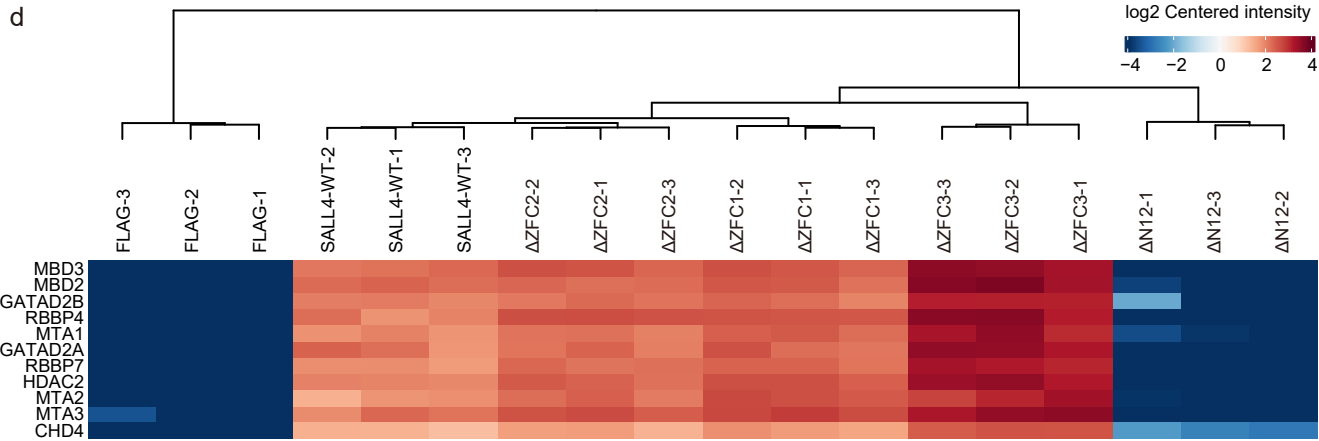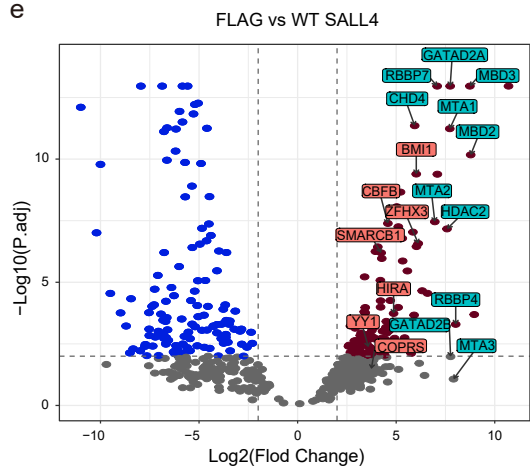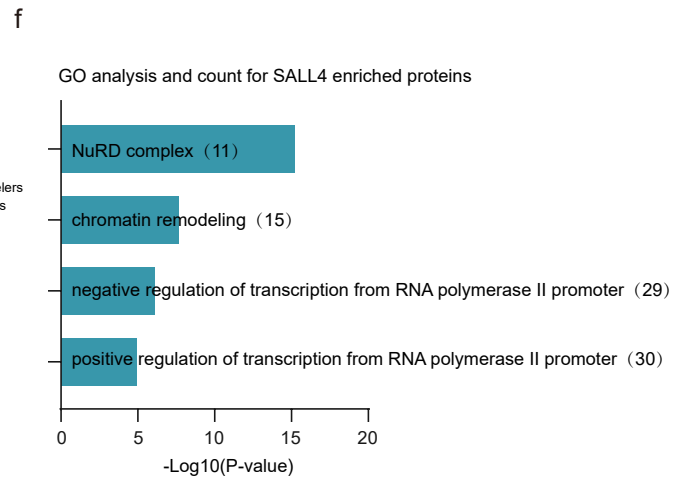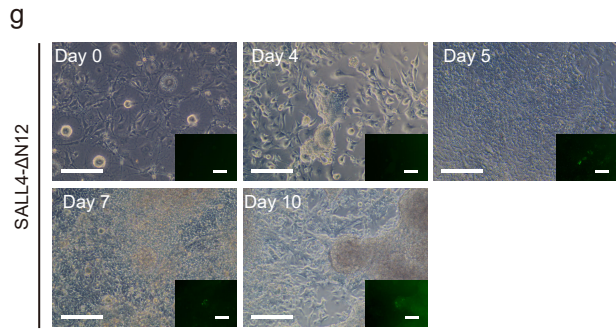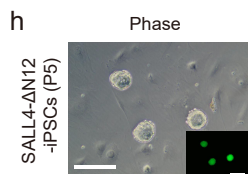

**j**

picked clones/iPSCs line

|                     |       |
|---------------------|-------|
| SALL4-WT            | 17/13 |
| SALL4- $\Delta$ N12 | 10/2  |

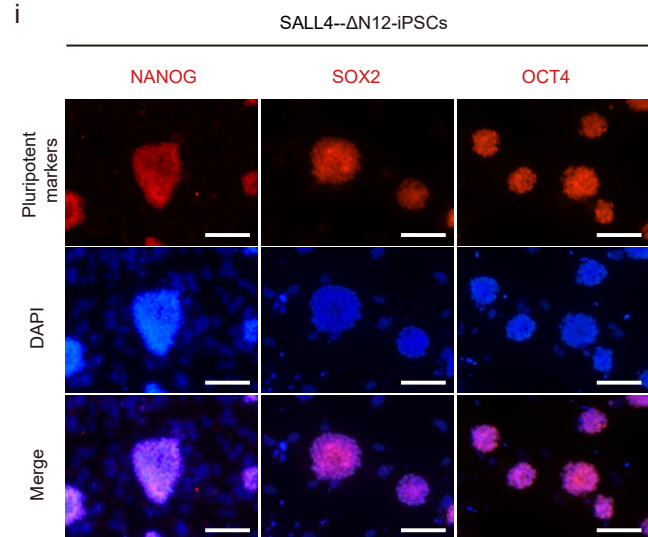

## **Supplementary Fig.2 The inhibition effect of SALL4-mutants in reprogramming**

**a.** Schematic representation of the protein sequences showing the structure of the wildtype SALL4 and SALL4 mutants. Color codes of ZFC1, ZFC2, ZFC3 and N12 are defined as described in Figure. **b.** Western blot shows the overexpression of SALL4 mutants in MEFs. **c.** The iPSCs induction efficiency at day10 using SALL4 mutants. Wildtype SALL4 as positive control are shown. Data are mean  $\pm$ SD. n = 6 well from 3 independent experiments. WT SALL4 versus SALL4 mutants, \*\*\*p = 0.0001689. **d.** Heatmaps for the level of NuRD complex-associated protein enriched by wild-type SALL4 and SALL4 mutants in reprogramming cells at day 2. **e.** Volcano plots of SALL4-WT enriched proteins of reprogramming samples at day2. IP-MS experiments were performed in triplicates and a two-sided t-test was applied. p.adjust=0.05 and fold change=2 were used as threshold. **f.** GO analysis for SALL4-WT specific enriched proteins. Statistical analysis was performed using Fisher's exact test, the  $-\text{Log}_{10}(\text{p value})$  for each term are shown. **g.** Morphological diagram for the iPSCs induction process using SALL4- $\Delta$ N12. Scale bars, 200 $\mu\text{m}$ . The experiments were repeated independently three times with similar results. **h.** The morphology of Passage 5 iPSCs colonies derived from MEFs by overexpressed SALL4- $\Delta$ N12 in iCD4. Scale bars, 200 $\mu\text{m}$ . The experiments were repeated independently three times with similar results. **i.** Immunofluorescence analysis of pluripotency markers in SALL4- $\Delta$ N12-iPSCs. Scale bars, 100 $\mu\text{m}$ . The experiments were repeated independently three times with similar results. **j.** The iPSCs colonies formation efficiency of OCT4-GFP<sup>+</sup> cells derived from SALL4- $\Delta$ N12 or SALL4-WT condition.

a

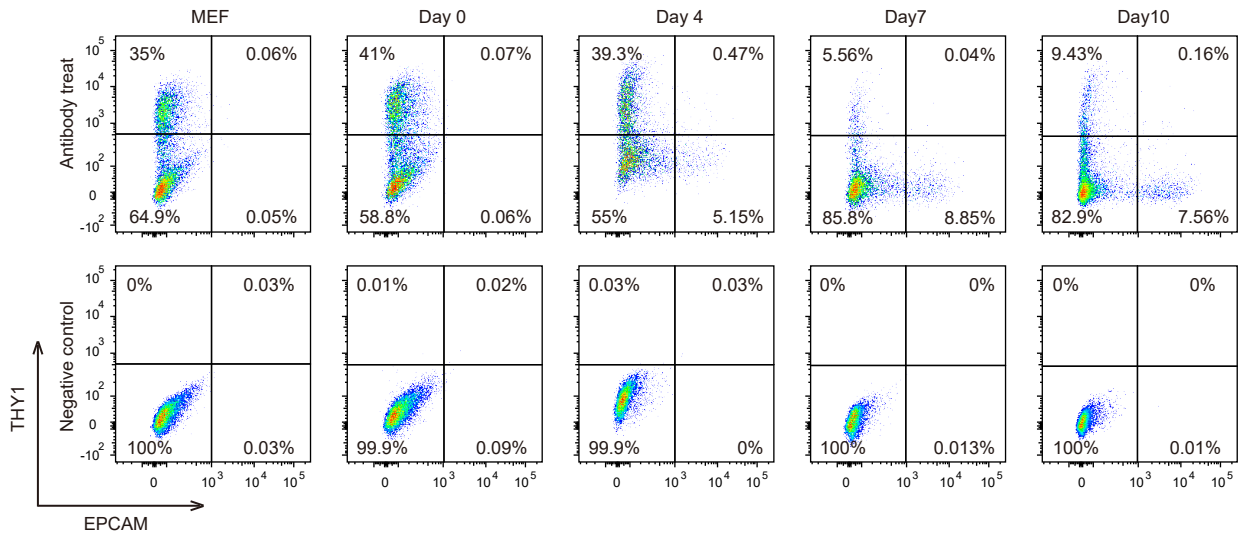

b

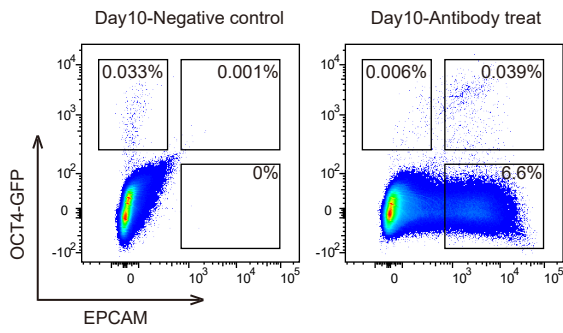

d

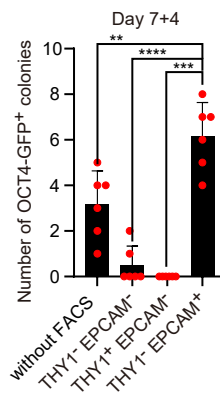

c

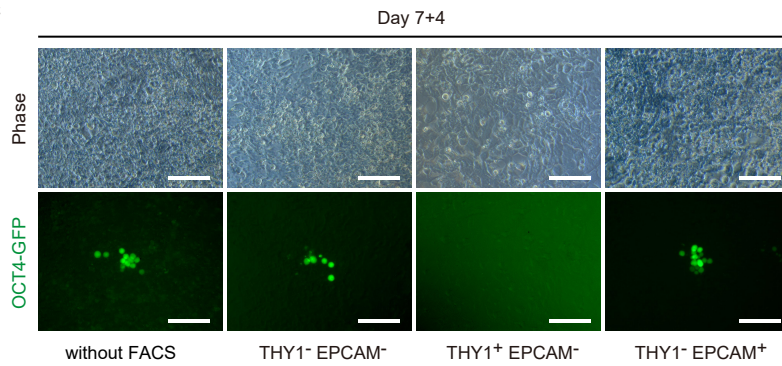

**Supplementary Fig.3 The Thy1<sup>-</sup>/Epcam<sup>+</sup> subgroup in SALL4 system has the potential to generate iPSCs**

**a.** Flow cytometry was used to analyze the proportion of THY1<sup>-</sup>/EPCAM<sup>+</sup> subgroup in SALL4 system at day0, day4, day7 and day10, respectively. **b.** FACS analysis of OCT4-GFP<sup>+</sup>/EPCAM<sup>+</sup> cells at day10. **c.** Morphological diagram for the iPSCs generation at day4 induced from the day7 THY1<sup>-</sup>/EPCAM<sup>+</sup> subgroup in SALL4 system. Scale bars, 100 $\mu$ m. The experiments were repeated independently three times with similar results. **d.** The OCT4-GFP<sup>+</sup> cells induction efficiency induced from subgroups classified by THY1 and EPCAM. Data are mean  $\pm$  SD. Statistical analysis was performed using two-tailed, unpaired t test; n = 6 well from 3 independent experiments. THY1<sup>-</sup>/EPCAM<sup>+</sup> versus without FACS, \*\*p = 0.0054460; THY1<sup>-</sup>/EPCAM<sup>+</sup> versus THY1<sup>-</sup>/EPCAM<sup>-</sup>, \*\*\*\*p = 0.0000386; THY1<sup>-</sup>/EPCAM<sup>+</sup> versus THY1<sup>+</sup>/EPCAM<sup>-</sup>, \*\*\*p = 0.0001510.

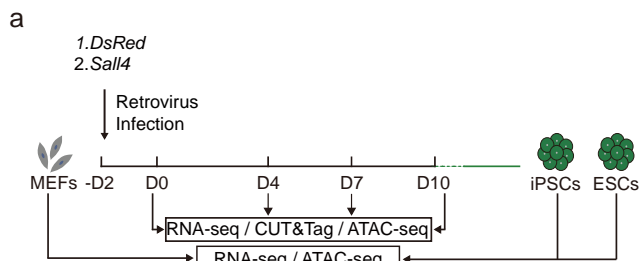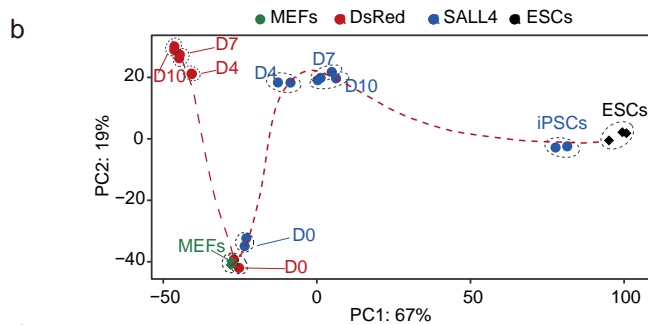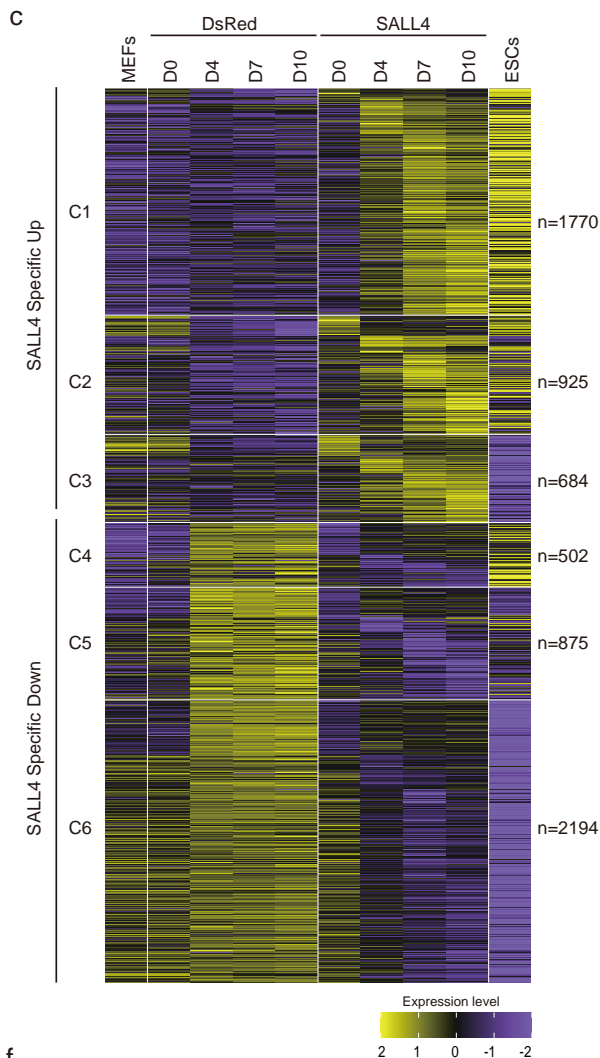

**d**

| Cluster                                   | GO biological process and count                                  | P-value  |
|-------------------------------------------|------------------------------------------------------------------|----------|
| SALL4 Specific Up (C1)                    | cell cycle(116)                                                  | 4.87E-19 |
|                                           | cellular response to DNA damage stimulus(80)                     | 3.81E-10 |
|                                           | DNA duplex unwinding(16)                                         | 4.32E-08 |
|                                           | meiotic cell cycle(37)                                           | 3.50E-06 |
|                                           | stem cell differentiation(17)                                    | 3.10E-05 |
|                                           | <b>epithelial cell morphogenesis(10)</b>                         | 6.09E-05 |
|                                           | <b>stem cell population maintenance(17)</b>                      | 1.08E-04 |
|                                           | cell proliferation(46)                                           | 1.67E-04 |
|                                           | regulation of transcription from RNA polymerase II promoter(155) | 4.03E-04 |
|                                           | <b>spermatogenesis(60)</b>                                       | 5.88E-04 |
|                                           | oogenesis(12)                                                    | 7.08E-04 |
|                                           | protein phosphorylation(71)                                      | 9.77E-04 |
|                                           | male meiosis (9)                                                 | 0.001793 |
|                                           | placenta development(12)                                         | 0.002252 |
| male meiosis(9)                           | 0.002715                                                         |          |
| regulation of Wnt signaling pathway(7)    | 0.003250                                                         |          |
| histone modification(10)                  | 0.004160                                                         |          |
| <b>embryonic pattern specification(8)</b> | 0.005205                                                         |          |

**e**

| Cluster                      | GO biological process and count                          | P-value  |
|------------------------------|----------------------------------------------------------|----------|
| SALL4 Specific Down (C6)     | <b>inflammatory response(101)</b>                        | 5.62E-20 |
|                              | angiogenesis(83)                                         | 7.41E-20 |
|                              | <b>nervous system development(99)</b>                    | 1.58E-15 |
|                              | positive regulation of ERK1 and ERK2 cascade(63)         | 3.26E-13 |
|                              | positive regulation of cell migration(67)                | 7.56E-13 |
|                              | positive regulation of angiogenesis(48)                  | 1.72E-12 |
|                              | positive regulation of neuron projection development(51) | 4.35E-12 |
|                              | positive regulation of synapse assembly(30)              | 1.26E-11 |
|                              | immune system process(101)                               | 5.23E-11 |
|                              | negative regulation of cell proliferation(79)            | 2.30E-08 |
|                              | ossification(33)                                         | 3.90E-08 |
|                              | learning or memory(25)                                   | 3.81E-07 |
|                              | <b>lung development(34)</b>                              | 5.19E-07 |
|                              | positive regulation of apoptotic process(69)             | 5.33E-07 |
|                              | neuron projection development(40)                        | 1.33E-06 |
|                              | axon guidance(41)                                        | 1.37E-06 |
| neuron migration(36)         | 1.47E-06                                                 |          |
| <b>heart development(54)</b> | 1.27E-05                                                 |          |

**f**

| Cluster                | GO biological process and count                  | -Log10 p-value |
|------------------------|--------------------------------------------------|----------------|
| SALL4 Specific up (C2) | <b>cell cycle(79)</b>                            | 19.524         |
|                        | cell division(56)                                | 16.582         |
|                        | positive regulation of chromosome segregation(7) | 5.227          |
|                        | mitotic spindle midzone assembly(6)              | 5.113          |
|                        | G2/M transition of mitotic cell cycle(11)        | 4.989          |
|                        | mitotic sister chromatid segregation(9)          | 4.678          |
|                        | G1/S transition of mitotic cell cycle(12)        | 4.362          |
|                        | mitotic spindle organization(10)                 | 4.238          |
|                        | glycolytic process(9)                            | 4.034          |
|                        | centrosome cycle(9)                              | 3.877          |
|                        | chromatin organization(28)                       | 3.835          |
|                        | mitotic cell cycle phase transition(7)           | 3.713          |
|                        | canonical glycolysis(6)                          | 3.530          |

| Cluster                | GO biological process and count            | -Log10 p-value |
|------------------------|--------------------------------------------|----------------|
| SALL4 Specific up (C3) | multicellular organism development(92)     | 18.959         |
|                        | cell differentiation(67)                   | 8.777          |
|                        | intermediate filament organization(16)     | 8.776          |
|                        | positive regulation of gene expression(47) | 8.770          |
|                        | cartilage development(18)                  | 8.680          |
|                        | skeletal system development(19)            | 7.826          |
|                        | embryonic limb morphogenesis(14)           | 7.469          |
|                        | chondrocyte differentiation(14)            | 7.138          |
|                        | cell-cell signaling(15)                    | 7.130          |
|                        | mesenchymal cell apoptotic process(7)      | 6.933          |
|                        | keratinization(15)                         | 6.469          |
|                        | embryonic hindlimb morphogenesis(10)       | 6.275          |
|                        | canonical Wnt signaling pathway(16)        | 6.228          |

**g**

| Cluster                  | GO biological process and count                                   | -Log10 p-value |
|--------------------------|-------------------------------------------------------------------|----------------|
| SALL4 Specific down (C4) | lipid metabolic process(38)                                       | 5.723          |
|                          | defense response to virus(20)                                     | 5.631          |
|                          | <b>immune system process(31)</b>                                  | 5.617          |
|                          | cellular response to interferon-beta(10)                          | 5.000          |
|                          | cellular detoxification of nitrogen compound(5)                   | 4.831          |
|                          | innate immune response(34)                                        | 4.604          |
|                          | response to bacterium(18)                                         | 3.607          |
|                          | negative regulation of viral genome replication(8)                | 3.582          |
|                          | response to drug(19)                                              | 3.534          |
|                          | response to virus(10)                                             | 3.493          |
|                          | nitrobenzene metabolic process(4)                                 | 3.467          |
|                          | negative regulation of NF-kappaB transcription factor activity(9) | 3.444          |
|                          | glutathione metabolic process(8)                                  | 3.400          |

| Cluster                  | GO biological process and count                                     | -Log10 p-value |
|--------------------------|---------------------------------------------------------------------|----------------|
| SALL4 Specific down (C5) | lipid metabolic process(70)                                         | 11.934         |
|                          | <b>immune system process(42)</b>                                    | 4.977          |
|                          | transmembrane transport(37)                                         | 4.644          |
|                          | positive regulation of reactive oxygen species metabolic process(9) | 4.452          |
|                          | response to interferon-gamma(8)                                     | 3.573          |
|                          | fatty acid beta-oxidation(9)                                        | 3.309          |
|                          | synaptic vesicle clustering(5)                                      | 3.285          |
|                          | negative regulation of neuron projection development(12)            | 3.280          |
|                          | lipid catabolic process(14)                                         | 3.153          |
|                          | negative regulation of cell cycle(9)                                | 3.078          |
|                          | carbohydrate metabolic process(19)                                  | 2.999          |
|                          | negative regulation of axon regeneration(5)                         | 2.975          |



#### **Supplementary Fig.4 Transcriptome analysis in SALL4-iPSCs reprogramming process**

**a.** SALL4-overexpressed reprogramming samples and DsRed-overexpressed control samples were collected for RNA-seq, ATAC-seq and Cut&Tag. **b.** PCA analysis for RNA-seq data from SALL4 or DsRed-mediated reprogramming process. RNA-seq data were collected from two independent experiment. **c.** Heatmaps of differential expression gene analysis for RNA-seq data from SALL4 and DsRed systems. The six subgroups (C1-C6) were based on the fold change of gene expression between MEFs and ESCs: C1 (gene counts number (GCN) in ESCs / GCN in MEFs  $\geq 2$ ); C2 ( $0.5 < \text{GCN in ESCs} / \text{GCN in MEFs} < 2$ ); C3 ( $\text{GCN in ESCs} / \text{GCN in MEFs} \leq 0.5$ ); C4 ( $\text{GCN in ESCs} / \text{GCN in MEFs} \leq 2$ ); C5 ( $0.5 > \text{GCN in ESCs} / \text{GCN in MEFs} > 2$ ); and C6 ( $\text{GCN in ESCs} / \text{GCN in MEFs} \geq 0.5$ ). **d-g.** GO analysis for genes specifically up-regulated and down-regulated by SALL4 in **c.** Statistical analysis for GO was performed using Fisher's exact test, the  $-\text{Log}_{10}(\text{p value})$  for each term are shown.

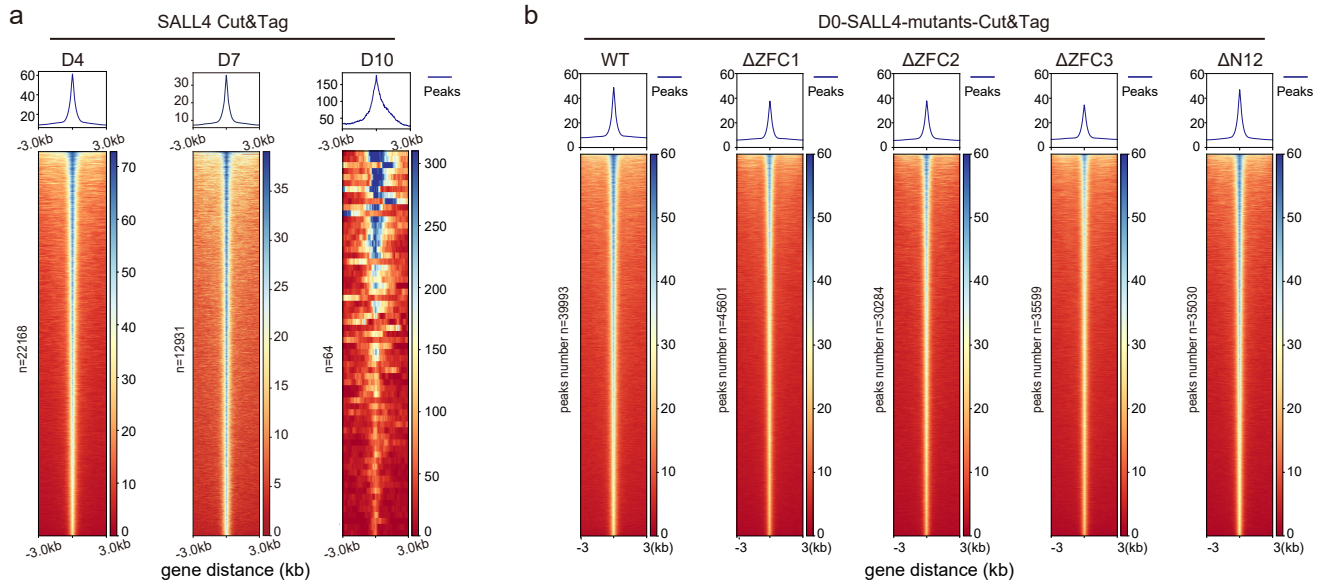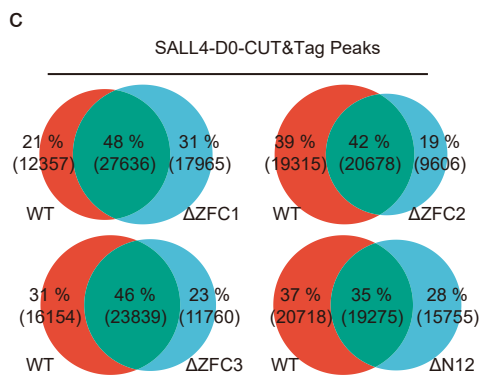

**d**

| Rank | TF           | Motif | Log P-value |
|------|--------------|-------|-------------|
| 1    | JUNB         |       | 6.793e+03   |
| 2    | TEAD3        |       | 6.804e+02   |
| 3    | RUNX2        |       | 6.282e+02   |
| 4    | NF1-HALFSITE |       | 3.551e+02   |
| 5    | SOX10        |       | 2.472e+02   |

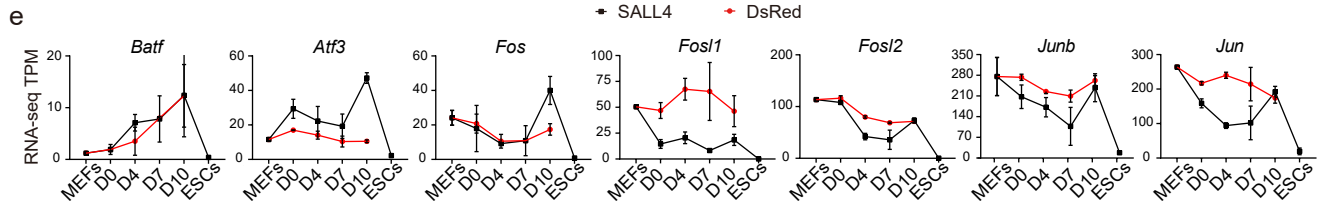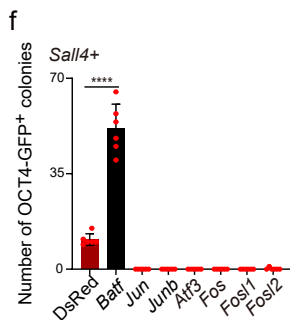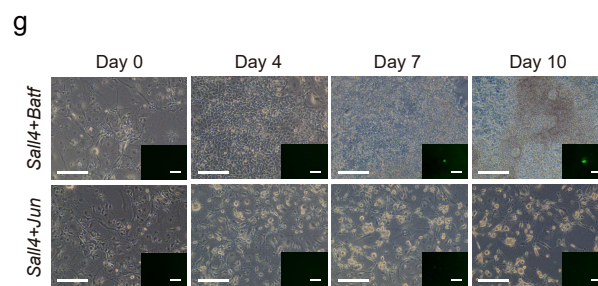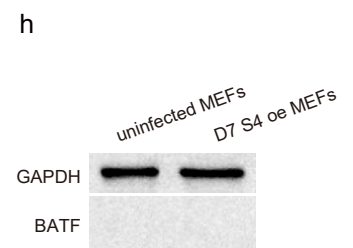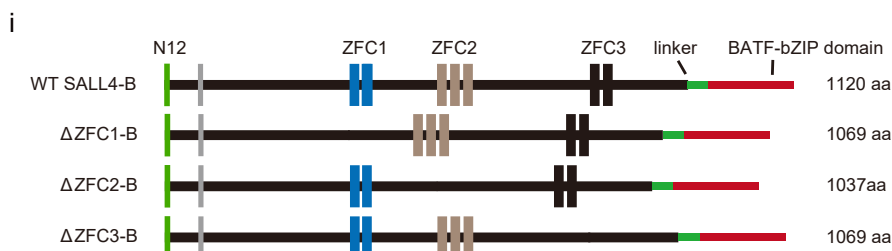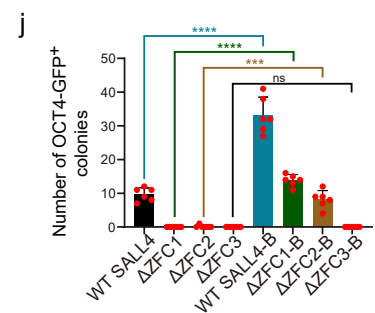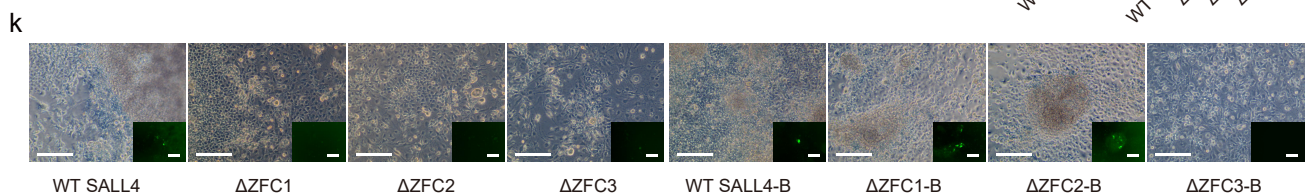

**Supplementary Fig.5 Cut&Tag analysis of SALL4 binding site during SALL4-mediated iPSCs reprogramming**

**a.** Heatmap of Cut&Tag at D4,7,10 from SALL4, showing all binding peaks centred on the peak region within a 3 kb window around the peak. **b.** Heatmap of Cut&Tag at D0 from wide-type SALL4 (WT) and SALL4 mutants ( $\Delta$ ZFC1,  $\Delta$ ZFC2,  $\Delta$ ZFC3 and  $\Delta$ N12), respectively. Showing all binding peaks centred on the peak region within a 3 kb window around the peak. **c.** Venn diagrams shows the overlapping numbers of day0 Cut&Tag peaks between WT-SALL4 and SALL4 mutants, respectively. **d.** De novo motif enrichment of SALL4-binding peaks. Statistical analysis was performed using Karlin/Altschul statistics. Top 5 motifs on each day ranked by  $-\text{Log}_{10}(\text{P-value})$  are shown, the left line (TF) of each chart shows proteins which could binding sequences most similar to the motif enriched by SALL4-binding peaks. **e.** RNA-seq shows the expression of representative genes in Fig.2e. DsRed, DsRed system. SALL4, SALL4 system. Data are mean  $\pm$  SD. n = 2 samples for each time point from 2 independent experiments. **f.** The iPSCs induction efficiency using SALL4 overexpressing with representative SALL4-binding peaks enriched-motifs related genes (*Batf*, *Jun*, *Junb*, *Atf3*, *Fos*, *Fosl1* and *Fosl2*). Data are mean  $\pm$  SD, Statistical analysis was performed using two-tailed, unpaired t test; n = 6 well from 3 independent experiments. *Sall4*+DsRed versus *Sall4*+*Batf*, \*\*\*\*p = 0.0000622. **g.** Morphological diagram for the iPSCs induction process using *Sall4* overexpressing with *Batf* or *Jun*, respectively. Scale bars, 200 $\mu$ m. The experiments were repeated independently three times with similar results. **h.** Western blot shows the absence of BATF protein in MEFs and the sample of D7 during SALL4-reprogramming. D7 S4 oe MEFs, D7 SALL4 overexpressed MEFs. **i.** Schematic representation of the protein sequences showing the structure of the wildtype SALL4 and SALL4 mutants which added the BATF-DNA binding domain. **j.** The number of OCT4-GFP<sup>+</sup> colonies on day 10 from 3  $\times 10^4$  MEFs infected with SALL4 mutants in Supplementary Fig.5i. Data are mean  $\pm$  SD. Statistical analysis was performed using two-tailed, unpaired t test; n = 6 well from 3 independent experiments. WT SALL4 versus WT SALL4-B, \*\*\*\*p = 0.0000388;  $\Delta$ ZFC1 versus  $\Delta$ ZFC1-B, \*\*\*\*p = 0.0000063;  $\Delta$ ZFC2 versus  $\Delta$ ZFC2-B, \*\*\*p = 0.0006027; **k.** Morphological diagram for the iPSCs induction process using the SALL4 mutants in Supplementary Fig.5j. Scale bars, 200 $\mu$ m. The experiments were repeated independently three times with similar results.

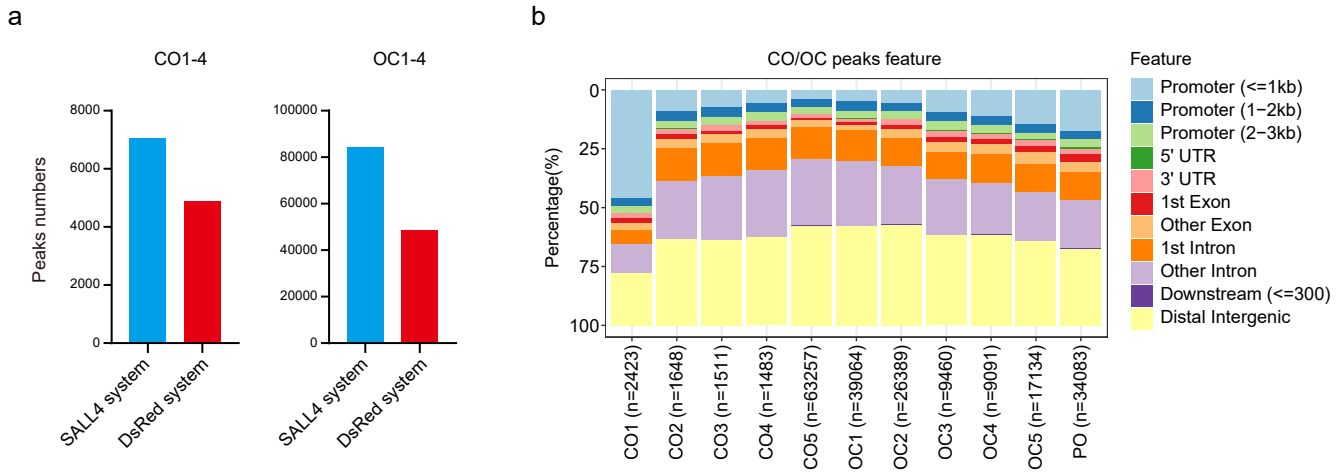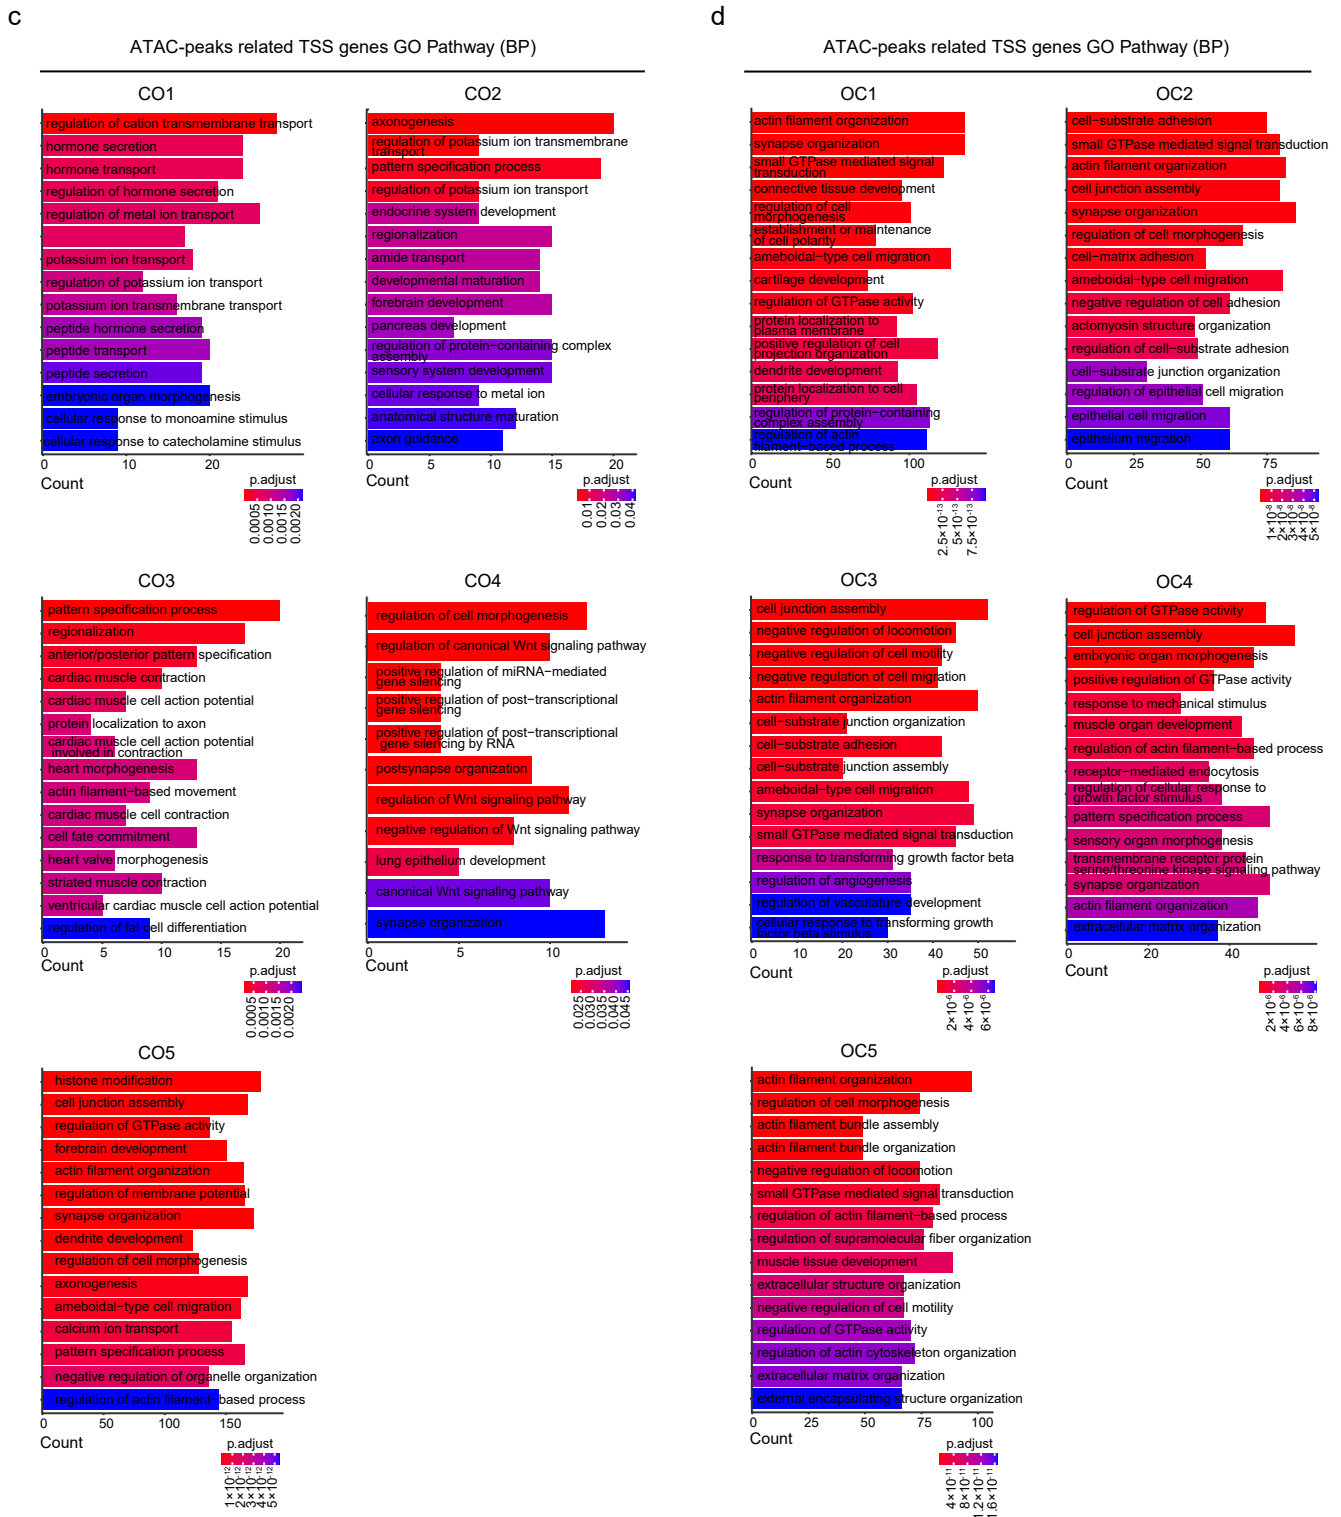

**Supplementary Fig.6 The distribution and GO analysis of SALL4-ATAC-peaks in genomic loci.**

**a.** The histogram shows the overall number of the peaks for CO1-4 and OC1-4 subgroups of SALL4 system and DsRed system. **b.** Genome distribution of the location for SALL4-ATAC-seq close to open peaks(CO) and open to close peaks(OC) relative to the nearest annotated genes. **c-d.** GO analysis for genes annotated by CO and OC peaks relative to the nearest TSS loci. Statistical analysis was performed using Fisher's exact test, the adjust p value for each term are shown.

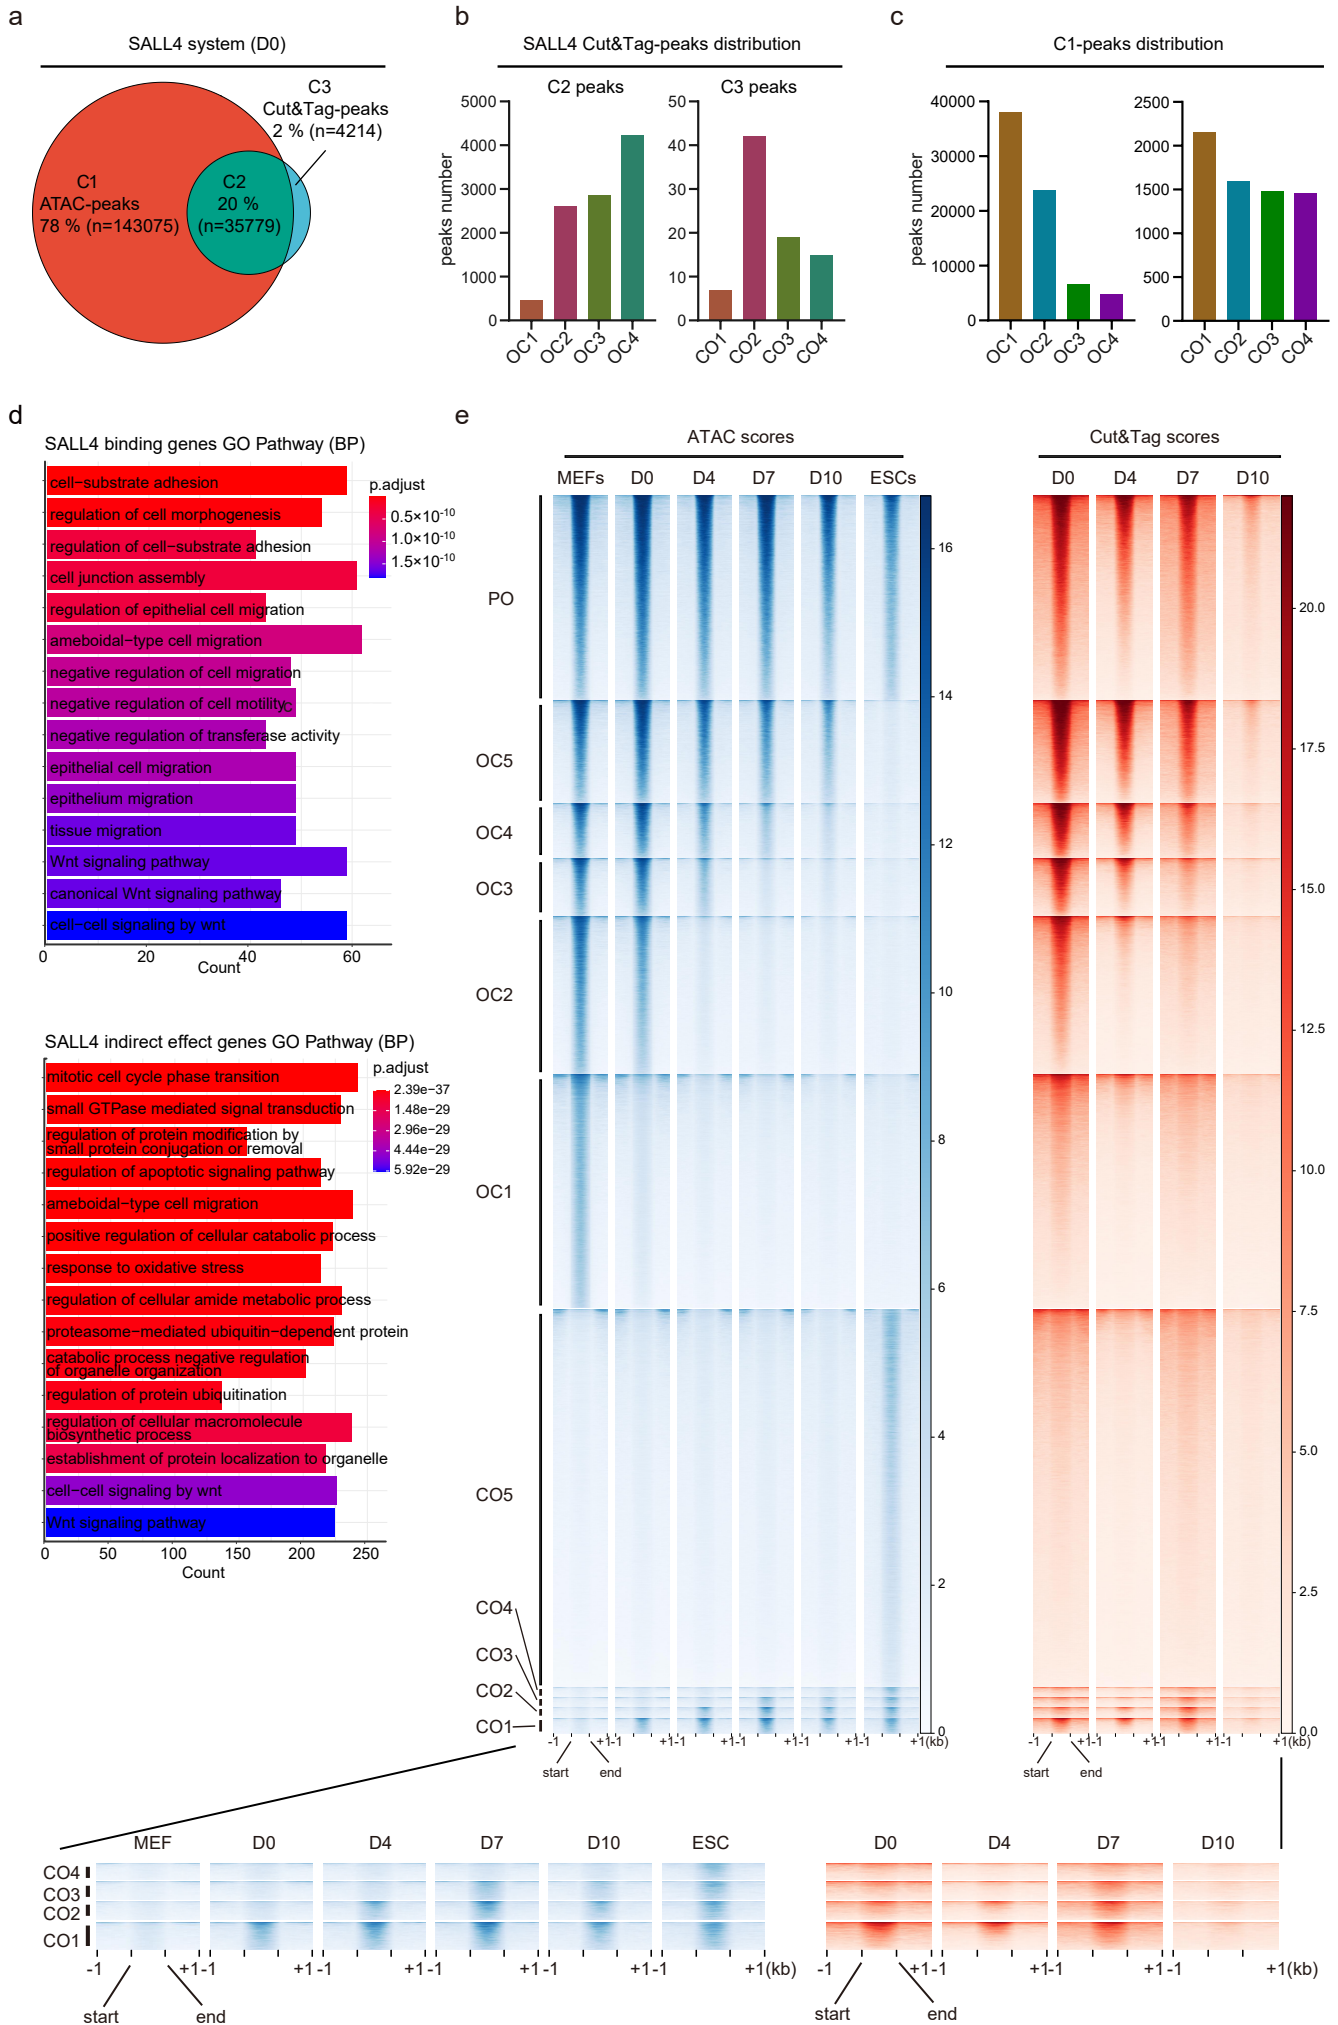

**Supplementary Fig.7 The whole regulatory landscape analysis during SALL4-driven reprogramming**

**a.** Venn diagrams shows the overlapping numbers between SALL4 Cut&Tag peaks and ATAC-seq peaks in SALL4 system at day0. **b.** SALL4 Cut&Tag peaks (C2 and C3) distribution in ATAC CO and OC subgroups. **c.** The histogram shows the Number of the peaks in CO and OC subgroups from ATAC-peaks overlap without Cut&Tag-peaks (C1). **d.** Top, GO analysis for genes annotated by Cut&Tag peaks in Supplementary Fig.7b. Bottom, GO analysis for genes annotated by ATAC peaks in Supplementary Fig.7c. Statistical analysis was performed using Fisher's exact test, the adjust p value for each term are shown. **e.** Heatmaps shows the CADs and SALL4-binding landscape during SALL4-driven reprogramming. The subgroups (CO and OC) were based on the classification of SALL4-ATAC data as described in results.

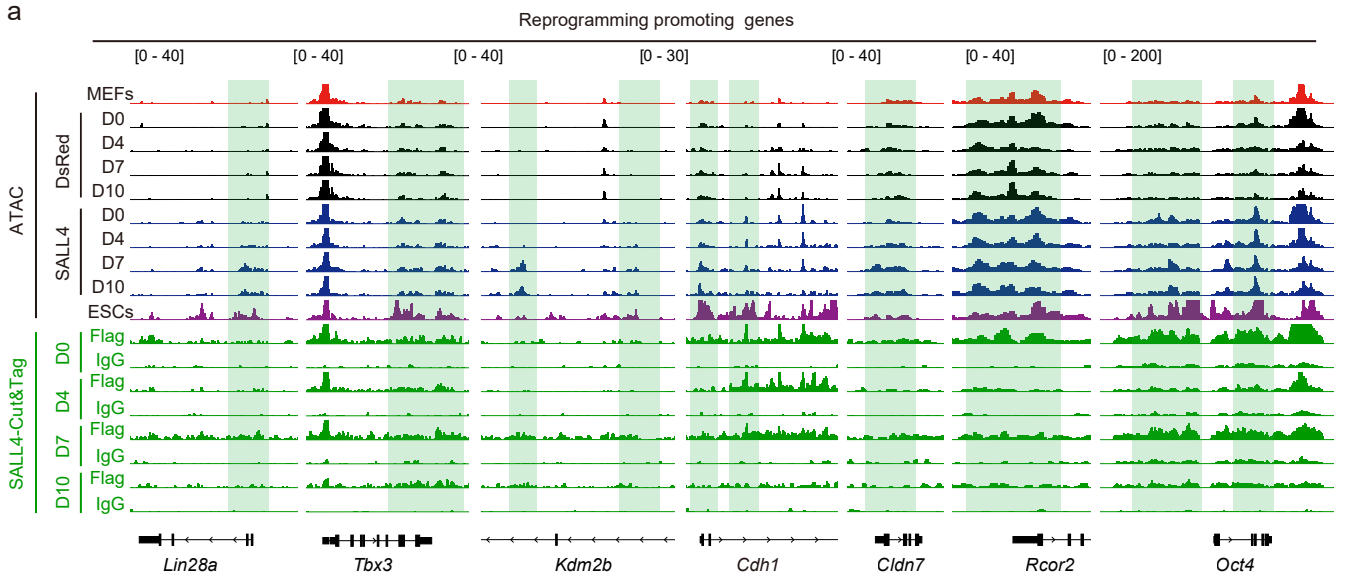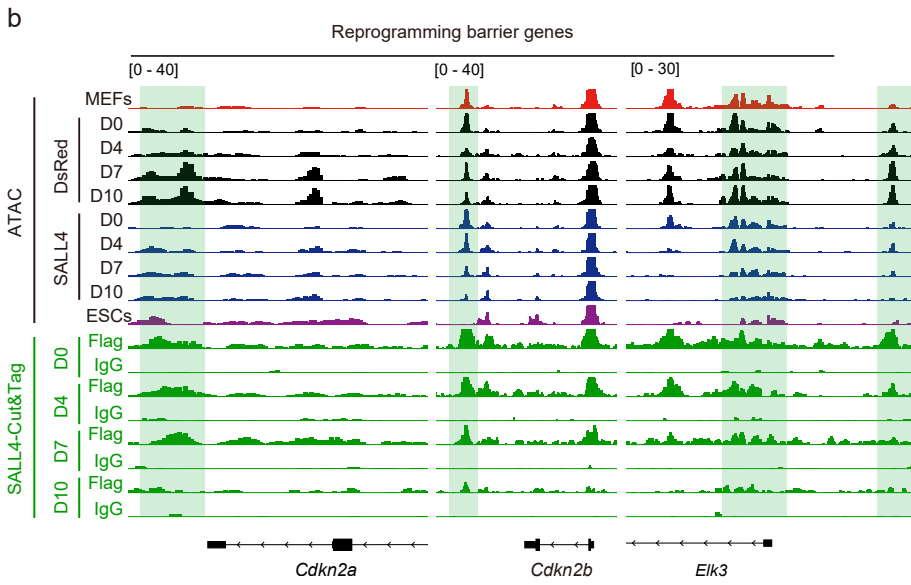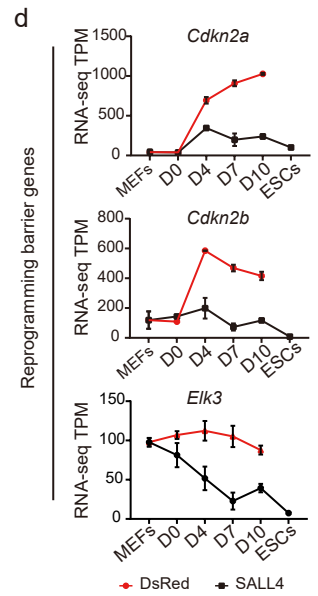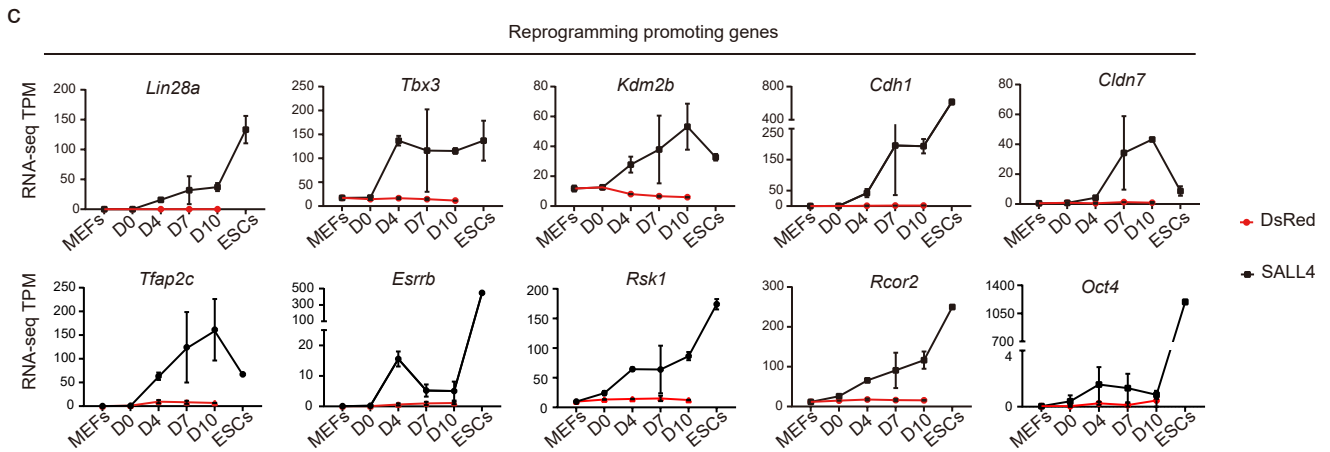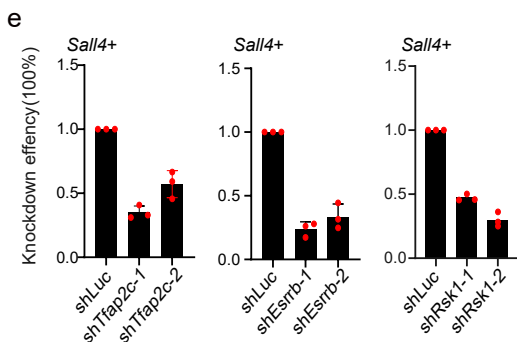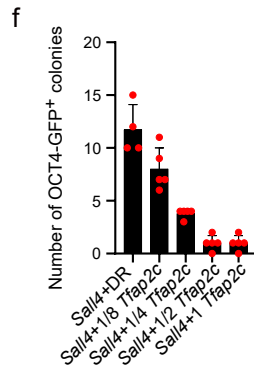



**Supplementary Fig.8 Genes that promote iPSCs reprogramming are upregulated in SALL4-mediated iPSCs induction**

**a.** ATAC-seq data and Cut&Tag data shows the peaks of representative reprogramming promoting genes and genomic loci. DsRed, DsRed system. SALL4, SALL4 system. **b.** ATAC-seq data and Cut&Tag data shows the peaks of representative reprogramming barrier genes and genomic loci. DsRed, DsRed system. SALL4, SALL4 system. **c.** RNA-seq data shows the expression of representative genes in **a**. Data are mean  $\pm$  SD. n = 2 samples for each time point from 2 independent experiments. DsRed, DsRed system. SALL4, SALL4 system. **d.** RNA-seq data shows the expression level of representative genes in **b**. Data are mean  $\pm$  SD. n = 2 samples for each time point from 2 independent experiments. DsRed, DsRed system. SALL4, SALL4 system. **e.** RT-qPCR showing the reduction of *Tfap2c*, *Esrrb* and *Rsk1* at mRNA level in the knockdown(sh*Tfap2c*) but not control(shLuc) cell line. The relative expression levels are normalized to shLuc. Data are mean  $\pm$  SD; n = 3 biological replicates. **f.** The number of OCT4-GFP<sup>+</sup> colonies on day 10 from  $3 \times 10^4$  MEFs infected with SALL4 and different volume of *Tfap2c* retroviral supernatants in iCD4.

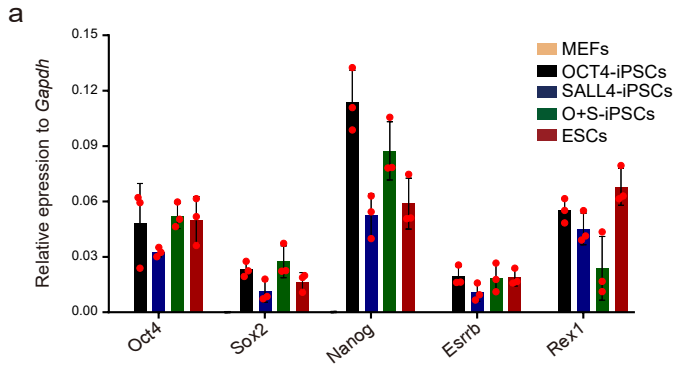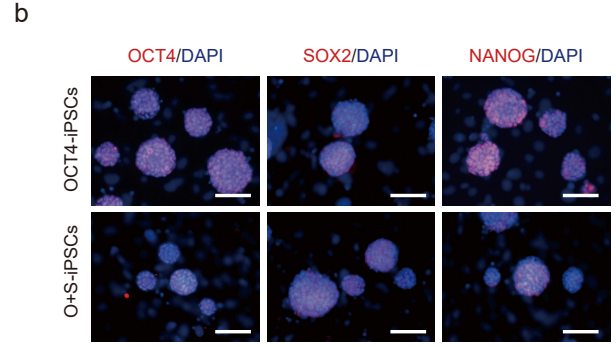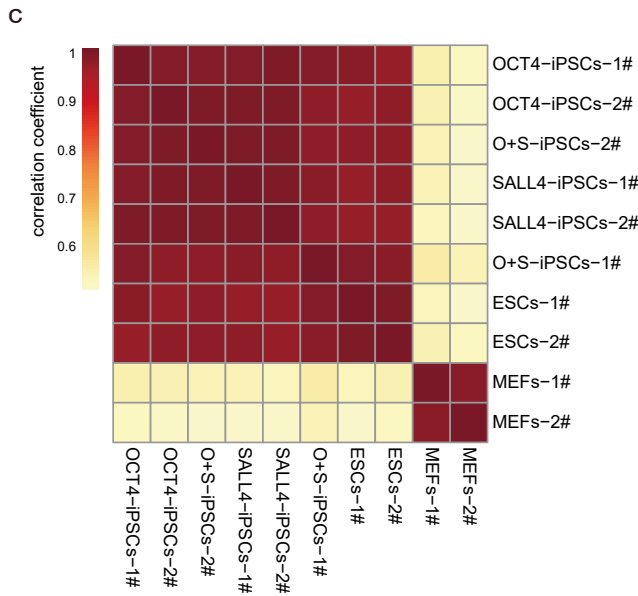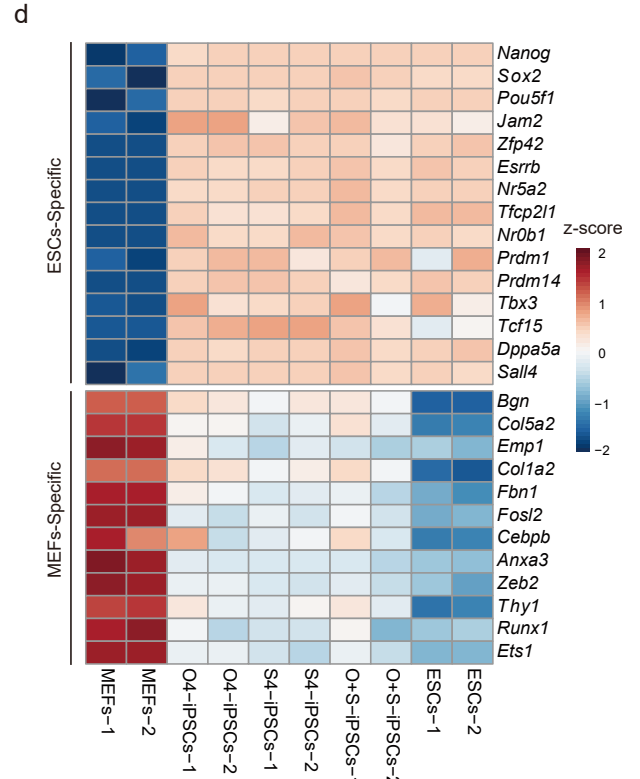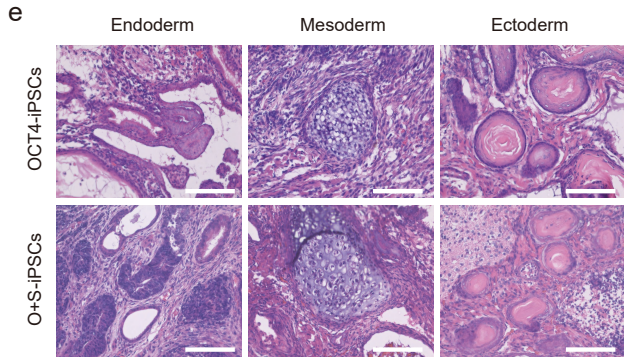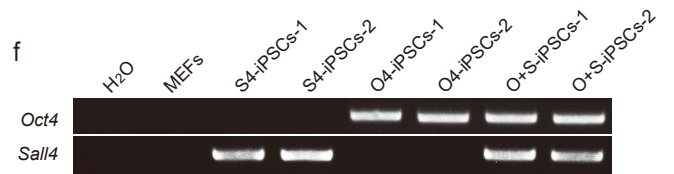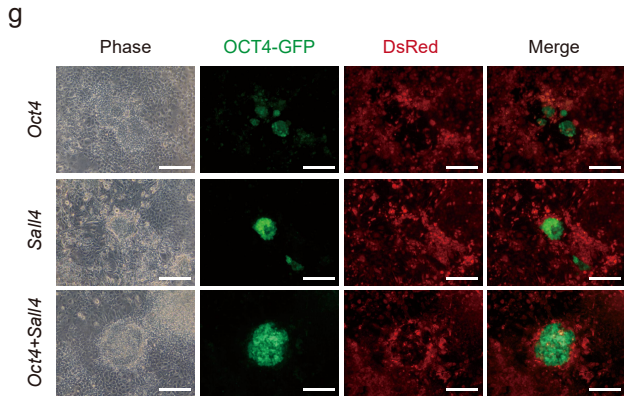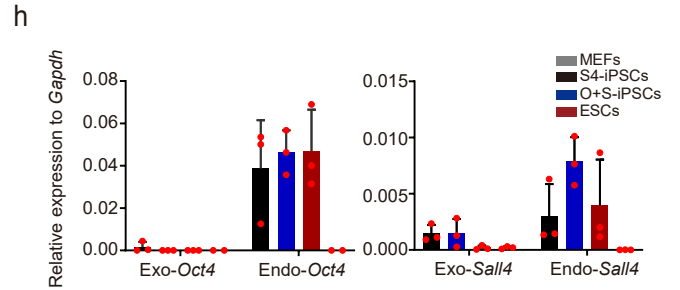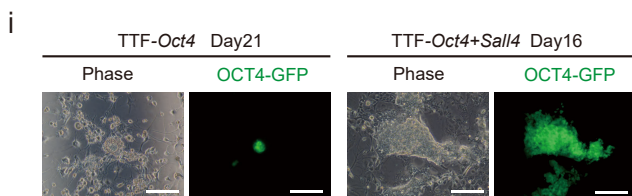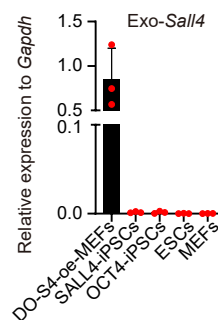

### Supplementary Fig.9 OCT4-iPSCs and O+S-iPSCs has pluripotency

**a.** qRT-PCR analysis of pluripotency markers in SALL4-iPSCs, OCT4-iPSCs and O+S-iPSCs. Data are mean  $\pm$  SD; n = 3 biological replicates. O+S, OCT4+SALL4. **b.** Immunofluorescence analysis of pluripotency markers in SALL4-iPSCs, OCT4-iPSCs and O+S-iPSCs. Scale bars, 200 $\mu$ m. O+S, OCT4+SALL4. The experiments were repeated independently three times with similar results. **c.** Correlation analysis for RNA-seq from SALL4-iPSCs, OCT4-iPSCs, O+S-iPSCs, MEFs and ESCs. n = 2 biological replicates. O+S, OCT4+SALL4. **d.** Heatmaps for the expression of Naive marker and MEFs specific genes in SALL4-iPSCs, OCT4-iPSCs, O+S-iPSCs, ESCs and MEFs in RNA-seq data. O4, OCT4. S4, SALL4. O+S, OCT4+SALL4. **e.** The three germ layers of a teratoma from OCT4-iPSCs and O+S-iPSCs. Endoderm, simple cuboidal epithelium. Mesoderm, chondrocyte. Ectoderm, skin tissue. Scale bars, 100 $\mu$ m. O+S, OCT4+SALL4. The experiments were repeated independently three times with similar results. **f.** Genomic insertion identification confirms the derivation of O4, S4 and O+S iPSCs colonies. The presence of the retroviral transgene was examined by PCR. n = 2 biological replicates. O4, OCT4. S4, SALL4. O+S, OCT4+SALL4. **g.** Exogenous gene silencing in OCT4-GFP<sup>+</sup> colonies. MEFs overexpressed *Sall4*, *Oct4* or *Sall4+Oct4* were co-infected with DsRed, respectively. Scale bars, 200 $\mu$ m. The experiments were repeated independently three times with similar results. **h.** qRT-PCR analysis of exogenous gene expression in iPSCs, MEFs and ESCs. Data are mean  $\pm$  SD; n = 3 biological replicates. D0-S4-oe-MEFs, D0-*Sall4*-overexpression-MEFs. S4, SALL4. O+S, OCT4+SALL4. **i.** The morphology of OCT4-GFP<sup>+</sup> cells induced by OCT4 or SALL4+OCT4 from TTFs. Scale bars, 200 $\mu$ m. The experiments were repeated independently three times with similar results.

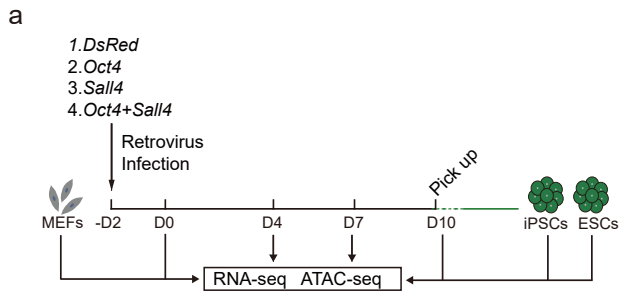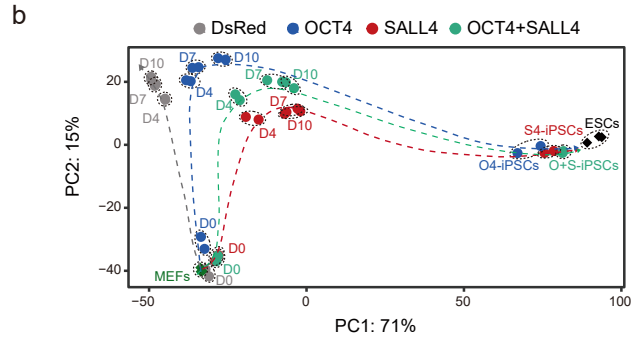

**c**

| Cluster                                                         | GO biological process and count                                 | -Log10(P-value) |
|-----------------------------------------------------------------|-----------------------------------------------------------------|-----------------|
| S4/O+S C-up (UC7)                                               | multicellular organism development(58)                          | 4.5053          |
|                                                                 | cell differentiation(52)                                        | 3.6474          |
|                                                                 | epithelial cell differentiation(10)                             | 2.4544          |
|                                                                 | negative regulation of cell migration(12)                       | 2.2046          |
|                                                                 | <b>epithelial cell morphogenesis(5)</b>                         | 2.1683          |
|                                                                 | regulation of transcription from RNA polymerase II promoter(65) | 1.9969          |
|                                                                 | <b>spermatogenesis(26)</b>                                      | 1.9059          |
|                                                                 | cell proliferation(19)                                          | 1.7864          |
|                                                                 | <b>stem cell proliferation(6)</b>                               | 1.3394          |
| O4/O+S C-up (UC10)                                              | <b>neuron differentiation(14)</b>                               | 5.3184          |
|                                                                 | multicellular organism development(29)                          | 4.3474          |
|                                                                 | cell differentiation(27)                                        | 4.0346          |
|                                                                 | neuron development(7)                                           | 3.8738          |
|                                                                 | <b>nervous system development(16)</b>                           | 3.8627          |
|                                                                 | phosphorylation(18)                                             | 3.1307          |
|                                                                 | intracellular signal transduction(12)                           | 1.9073          |
|                                                                 | neuron migration(6)                                             | 1.5148          |
| regulation of transcription from RNA polymerase II promoter(27) | 1.4114                                                          |                 |
| O+S Sp-up (UC19)                                                | <b>DNA methylation involved in gamete generation(6)</b>         | 5.6312          |
|                                                                 | piRNA metabolic process(6)                                      | 5.5171          |
|                                                                 | <b>spermatogenesis(18)</b>                                      | 4.0447          |
|                                                                 | meiotic cell cycle(11)                                          | 3.7386          |
|                                                                 | male meiosis I(5)                                               | 3.3572          |
|                                                                 | <b>stem cell population maintenance(6)</b>                      | 2.7770          |
|                                                                 | germ cell development(6)                                        | 2.5410          |
|                                                                 | glutathione metabolic process(5)                                | 2.2806          |
|                                                                 | regulation of transcription from RNA polymerase II promoter(30) | 2.0844          |

**d**

| Cluster                               | GO biological process and count                                     | -Log10(P-value) |
|---------------------------------------|---------------------------------------------------------------------|-----------------|
| S4/O+S C-D (DC9)                      | cell adhesion(73)                                                   | 17.796          |
|                                       | homophilic cell adhesion via plasma membrane adhesion molecules(35) | 14.858          |
|                                       | positive regulation of synapse assembly(19)                         | 9.7254          |
|                                       | regulation of presynapse assembly(14)                               | 9.2070          |
|                                       | <b>positive regulation of neuron projection development(25)</b>     | 7.0699          |
|                                       | memory(18)                                                          | 5.6926          |
|                                       | modulation of synaptic transmission(18)                             | 5.0196          |
|                                       | <b>nervous system development(36)</b>                               | 4.5833          |
|                                       |                                                                     |                 |
| O4/O+S C-D (DC12)                     | extracellular matrix organization(13)                               | 7.1391          |
|                                       | <b>negative regulation of neuron apoptotic process(10)</b>          | 4.3000          |
|                                       | positive regulation of cell migration(11)                           | 3.9112          |
|                                       | positive regulation of endothelial cell migration(6)                | 3.6676          |
|                                       | positive regulation of angiogenesis(8)                              | 3.3046          |
|                                       | positive regulation of fibroblast proliferation(6)                  | 3.2353          |
|                                       | <b>inflammatory response(11)</b>                                    | 2.6225          |
| intracellular signal transduction(11) | 2.2453                                                              |                 |
| O+S Sp-D (DC21)                       | membrane raft assembly(3)                                           | 2.9179          |
|                                       | <b>endocytosis(7)</b>                                               | 2.2852          |
|                                       | prepulse inhibition(3)                                              | 2.0334          |
|                                       | <b>integrin-mediated signaling pathway(5)</b>                       | 2.0232          |
|                                       | cell-substrate adhesion(3)                                          | 1.8720          |
|                                       | hydrogen ion transmembrane transport(4)                             | 1.8412          |
|                                       | actin cytoskeleton reorganization(4)                                | 1.8237          |
|                                       | modulation of inhibitory postsynaptic potential(2)                  | 1.8137          |

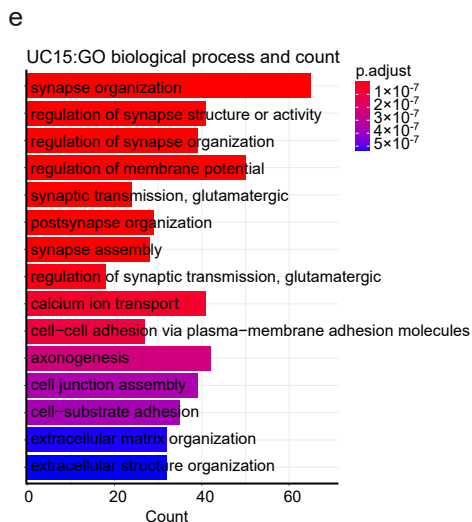

**Supplementary Fig.10 Transcriptome analysis in SALL4, OCT4 and O+S- mediated iPSCs reprogramming process**

**a.** Diagram for RNA-seq and ATAC-seq data collecting during SALL4, OCT4 and OCT4+SALL4 reprogramming process. **b.** PCA analysis for RNA-seq data from DsRed, SALL4, OCT4 and O+S system. RNA-seq data were collected from two independent experiment. DR, DsRed system. O4, OCT4 system. S4, SALL4 system. O+S, OCT4+SALL4 system. **c.** GO analysis for the clusters of genes in Fig.4e, which contains specific-upregulated in O+S and O+S co-upregulated with SALL4 or OCT4, respectively. Statistical analysis was performed using Fisher's exact test, the  $-\text{Log}_{10}(\text{p value})$  for each term are shown. O4, OCT4 system. S4, SALL4 system. O+S, OCT4+SALL4 system. C-up, common upregulated. sp-up, specific upregulated. **d.** GO analysis for the clusters of genes in Fig.4f, which contains specific-downregulated in O+S and O+S co-downregulated with SALL4 or OCT4, respectively. Statistical analysis was performed using Fisher's exact test, the  $-\text{Log}_{10}(\text{p value})$  for each term are shown. O4, OCT4 system. S4, SALL4 system. O+S, OCT4+SALL4 system. C-D, common downregulated. sp-D, specific downregulated. **e.** GO analysis for the clusters of genes in Fig.4e, which contains specific-upregulated in OCT4 system. Statistical analysis was performed using Fisher's exact test, the adjust p value for each term are shown.

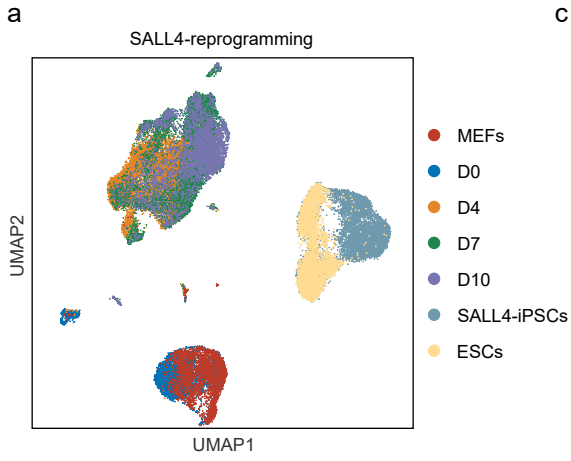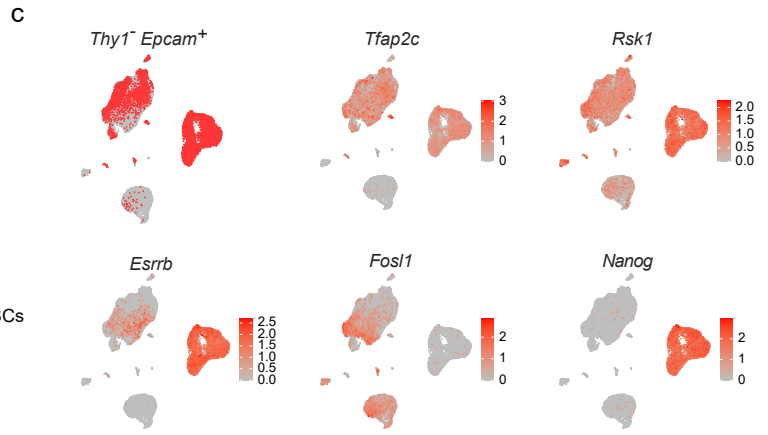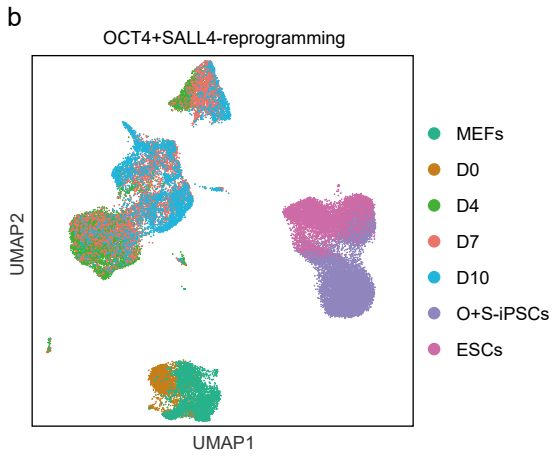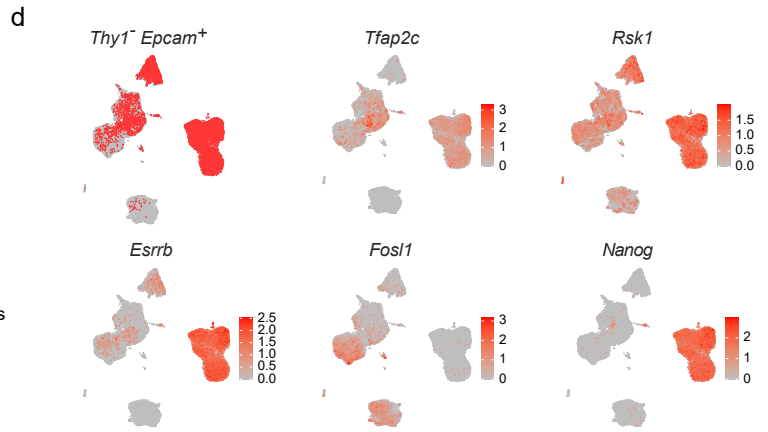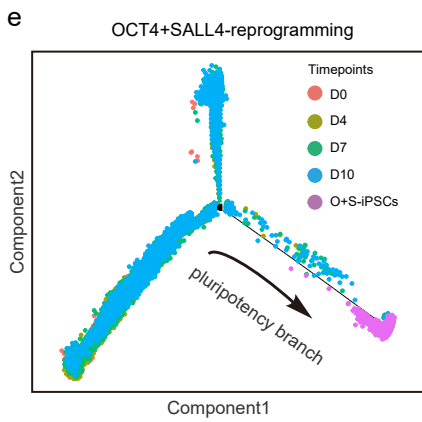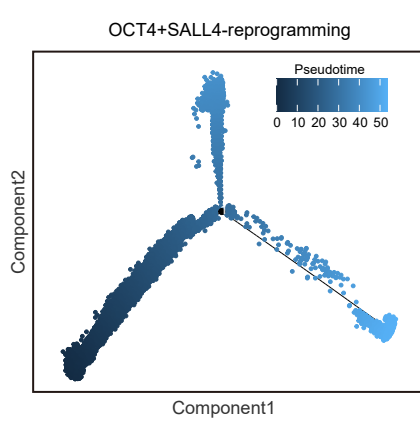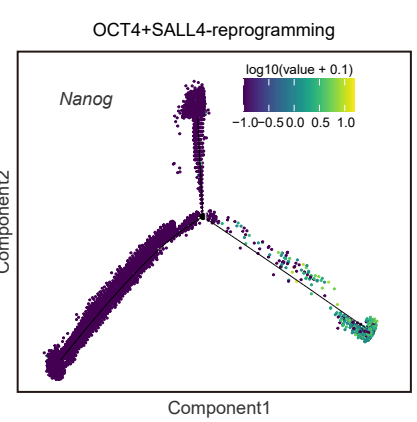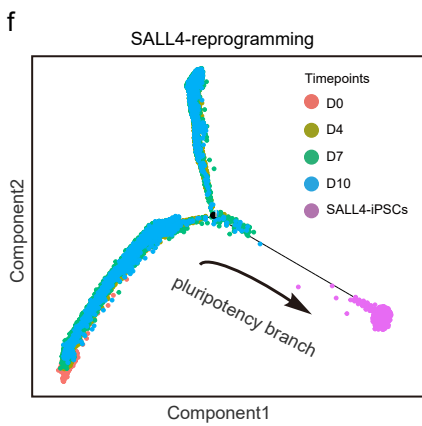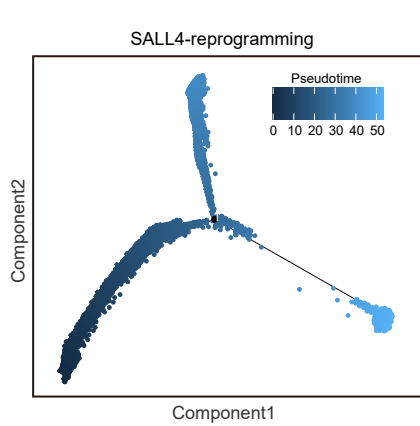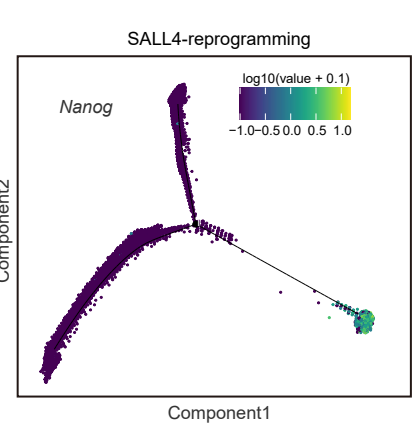

**Supplementary Fig.11 Single-cell RNA sequencing of SALL4 or OCT4+SALL4-driven reprogramming process**

**a-b.** UMAP plot for Single-cell RNA-seq data from SALL4-mediated reprogramming (**a**) and OCT4+SALL4 reprogramming process (**b**). Each dot represents one cell. The sampling time points are shown with color code. **c-d.** The expression of representative markers in SALL4-mediated reprogramming (**c**) and OCT4+SALL4 reprogramming process (**d**). **e-f.** Monocle trajectories of reprogramming samples mediated by OCT4+SALL4 (**e**) and SALL4 alone (**f**) are depicted with color-coding representing reprogramming timepoints (left), pseudotime (middle), and Nanog expression levels (right). Each data point represents an individual cell, with the ordering of cells inferred based on the expression patterns of the most variable genes across reprogramming samples.

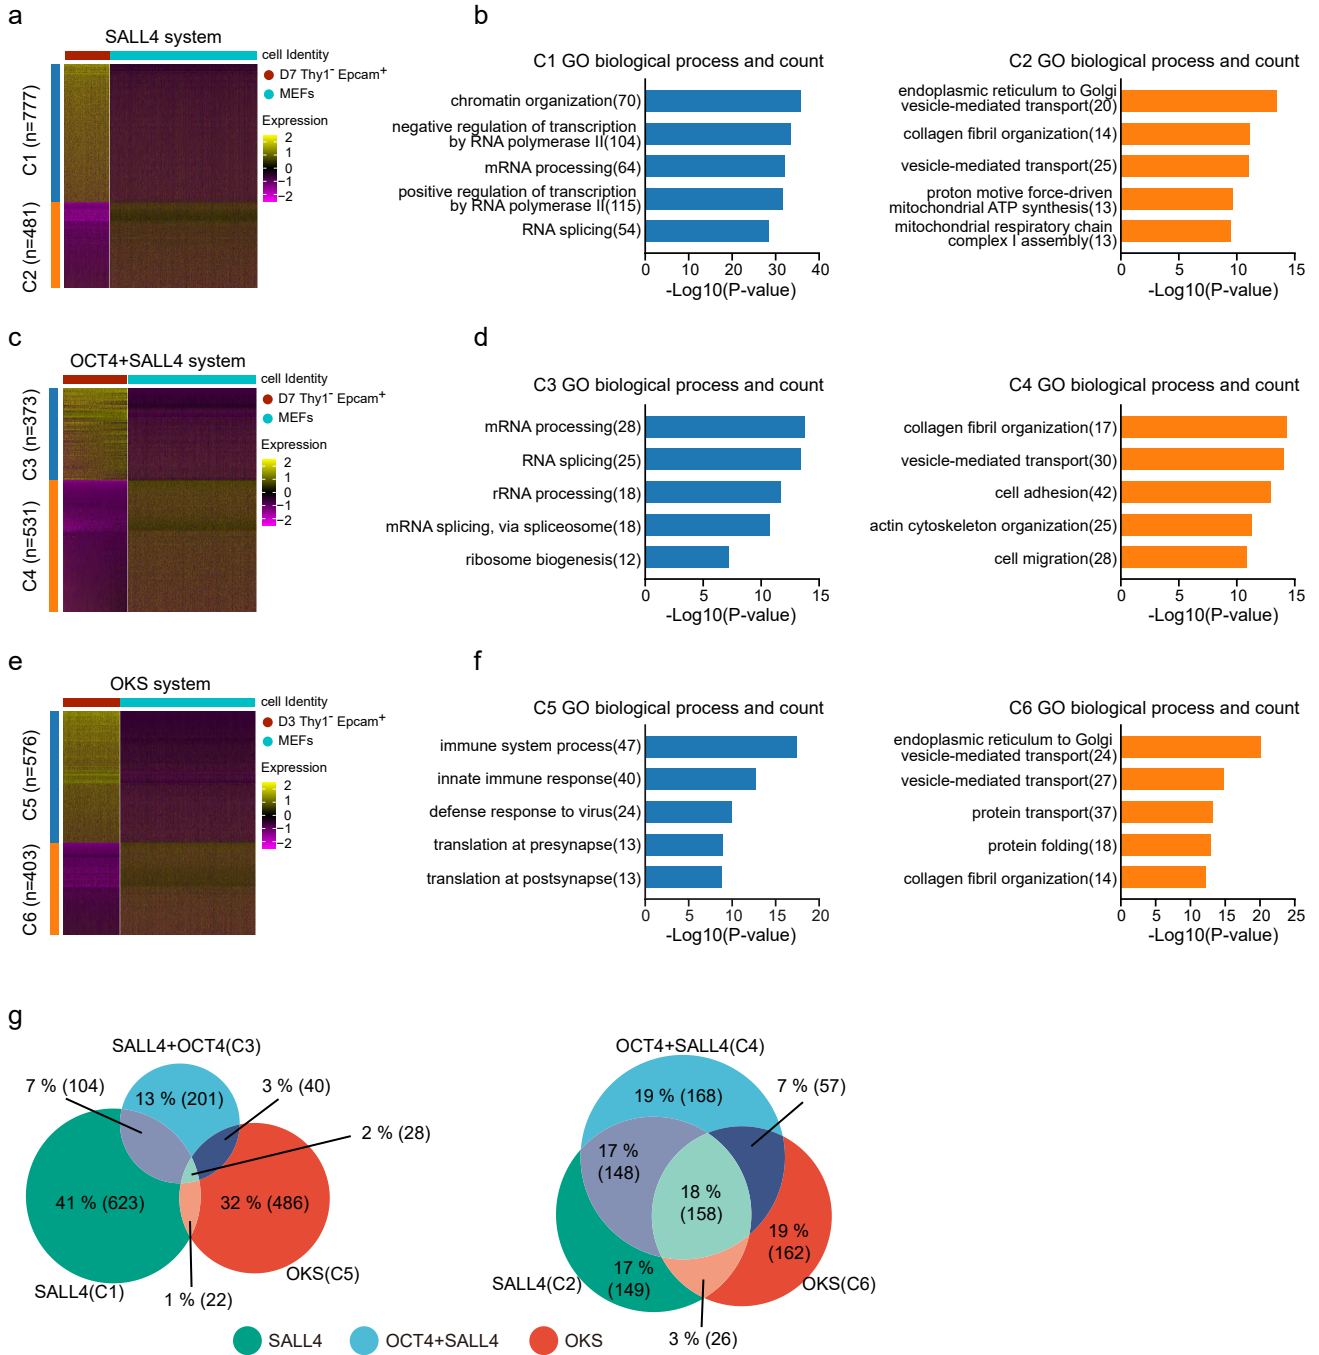



**Supplementary Fig.12 Diverse Characteristics of Thy1<sup>+</sup>/Epcam<sup>+</sup> Intermediates in distinct Reprogramming processes**

**a-f.** Heatmaps of differential expression gene analysis for scRNA-seq data from SALL4 system (**a**), OCT4+SALL4 system (**c**) and OKS systems (**e**). The 6 subgroups (C1-C6) of differential expression genes were based on gene expression between MEFs and THY1<sup>+</sup>/EPCAM<sup>+</sup> cells. GO analysis for each subgroup are shown (**b**, **d** and **f**). Statistical analysis for GO was performed using Fisher's exact test, the  $-\text{Log}_{10}(\text{p value})$  for each term are shown. **g.** Venn diagrams shows the number of differential expression genes of THY1<sup>+</sup>/EPCAM<sup>+</sup> cells between SALL4 system, OCT4+SALL4 system and OKS system.

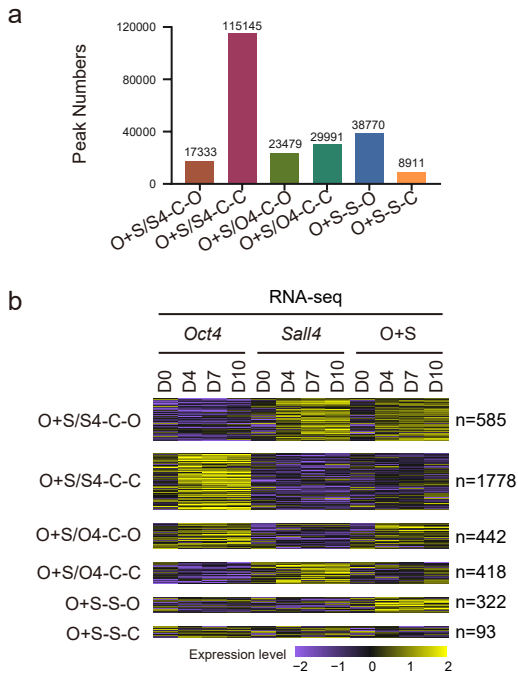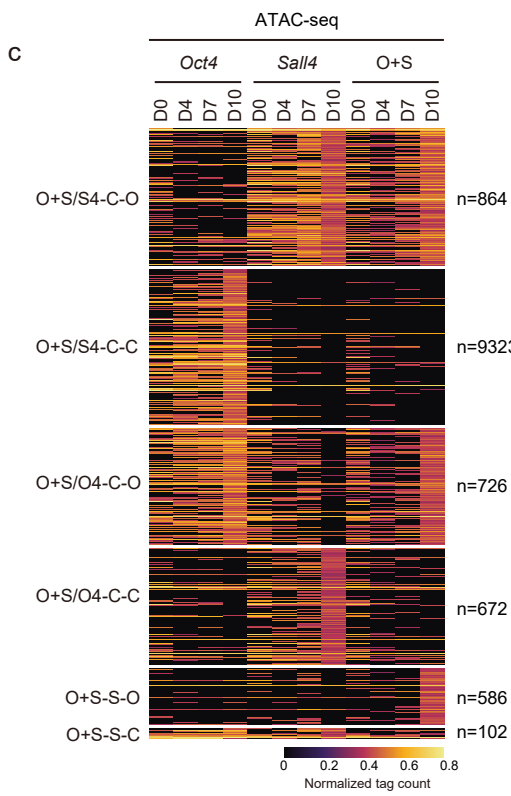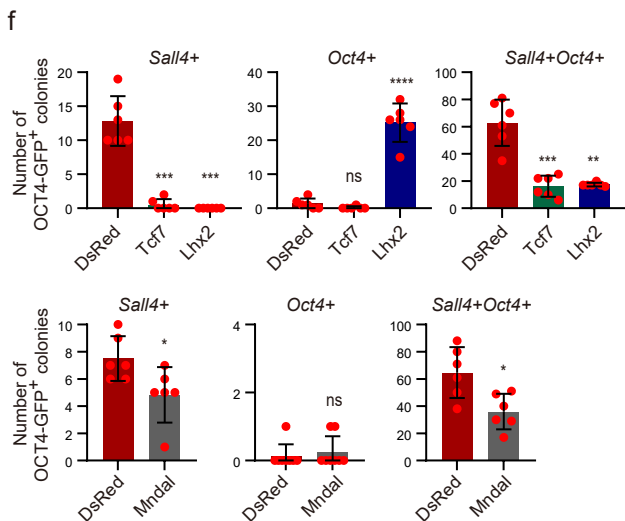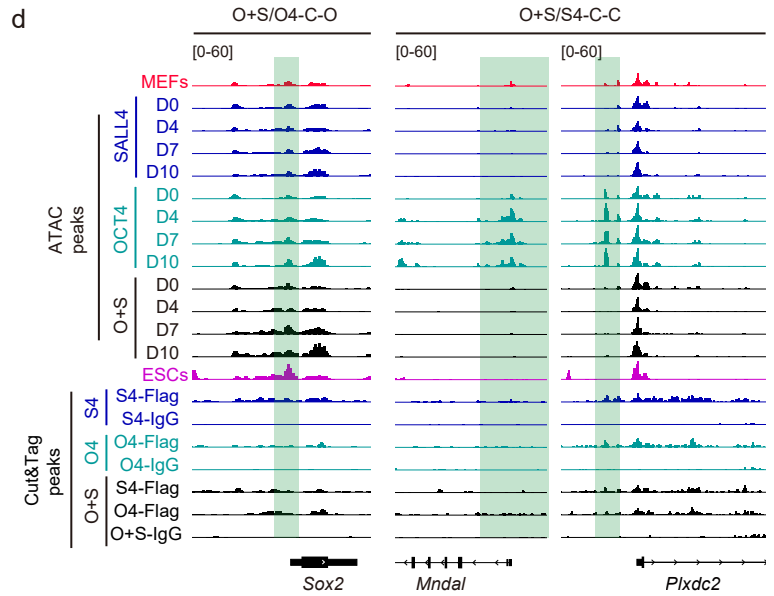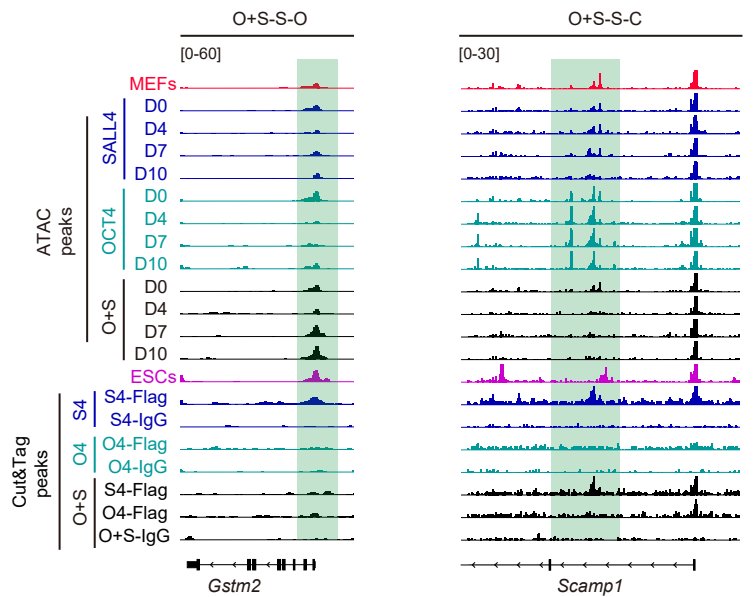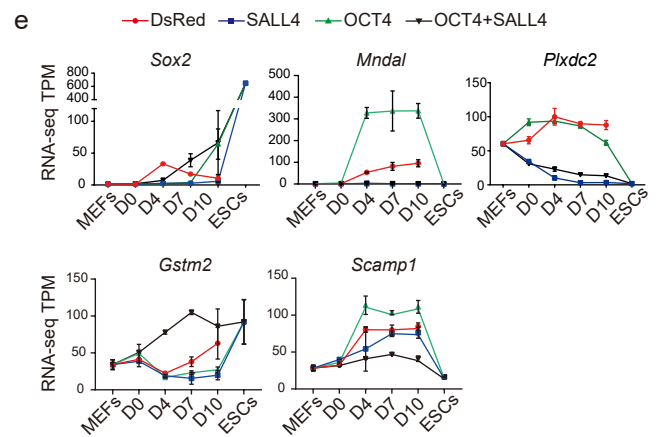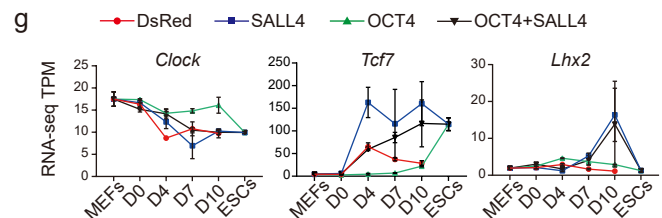

**Supplementary Fig.13 SALL4 and OCT4 can regulate reprogramming-relative genes in O+S-mediated iPSCs induction**

**a.** The histogram shows the number of the peaks for CADs patterns. O+S/O4-C-O, OCT4+SALL4/OCT4-Common-open; O+S/O4-C-C, OCT4+SALL4/OCT4-Common-close; O+S/S4-C-O, OCT4+SALL4/SALL4-Common-open; O+S/S4-C-C, OCT4+SALL4/SALL4-Common-close; O+S-S-O, OCT4+SALL4 Specific-open; O+S-S-C, OCT4+SALL4 Specific-close. **b.** Heatmaps of differential expression genes related to CADs patterns for RNA-seq data from O+S system, SALL4 system and OCT4 system. **c.** Heatmaps of CADs patterns corresponding to differential expression genes in Supplementary Fig.13b. The differential transition peaks for each systems are shown. **d.** Representative Genomic loci and genes for O+S-S-O peaks, O+S/O4-C-O peaks, O+S-S-C peaks, O+S/S4-C-C peaks and Cut&Tag-binding peaks. O4, OCT4. S4, SALL4. O+S, OCT4+SALL4; O+S/O4-C-O, OCT4+SALL4/OCT4-Common-open; O+S/S4-C-C, OCT4+SALL4/SALL4-Common-close; O+S-S-O, OCT4+SALL4 Specific-open; O+S-S-C, OCT4+SALL4 Specific-close. **e.** RNA-seq data shows the expression of representative genes in Supplementary Fig.13d. Data are mean  $\pm$  SD. n = 2 samples for each time point from 2 independent experiments. DsRed, DsRed system. OCT4, OCT4 system. SALL4, SALL4 system. OCT4+SALL4, OCT4+SALL4 system. **f.** The iPSCs induction efficiency using *Sall4*, *Oct4* or *Oct4+Sall4* overexpressing with *Tcf7*, *Lhx2* or *Mndal*. Data are mean  $\pm$  SD. Statistical analysis was performed using two-tailed, unpaired t test; n = 6 well from 3 independent experiments. *Sall4*+DsRed versus *Sall4*+*Tcf7*, \*\*\*p = 0.0002964; *Sall4*+DsRed versus *Sall4*+*Lhx2*, \*\*\*p = 0.0003510; *Sall4*+DsRed versus *Sall4*+*Mndal*, \*p = 0.0328333; *Oct4*+DsRed versus *Oct4*+*Tcf7*, n.s. p = 0.1189675; *Oct4*+DsRed versus *Oct4*+*Lhx2*, \*\*\*\*p = 0.0000815; *Oct4*+DsRed versus *Oct4*+*Mndal*, n.s. p = 0.5497377; *Sall4*+*Oct4*+DsRed versus *Sall4*+*Oct4*+*Tcf7*, \*\*\*p = 0.0004947; *Sall4*+*Oct4*+DsRed versus *Sall4*+*Oct4*+*Lhx2*, \*\*p = 0.0012187; *Sall4*+*Oct4*+DsRed versus *Sall4*+*Oct4*+*Mndal*, \*p = 0.0134630. **g.** The expression levels for the representative motif-related genes in Fig.5b. The TPM value of genes from RNA-seq data are shown. Data are mean  $\pm$  SD. n = 2 samples for each time point from 2 independent experiments. DsRed, DsRed system. OCT4, OCT4 system. SALL4, SALL4 system. OCT4+SALL4, OCT4+SALL4 system.

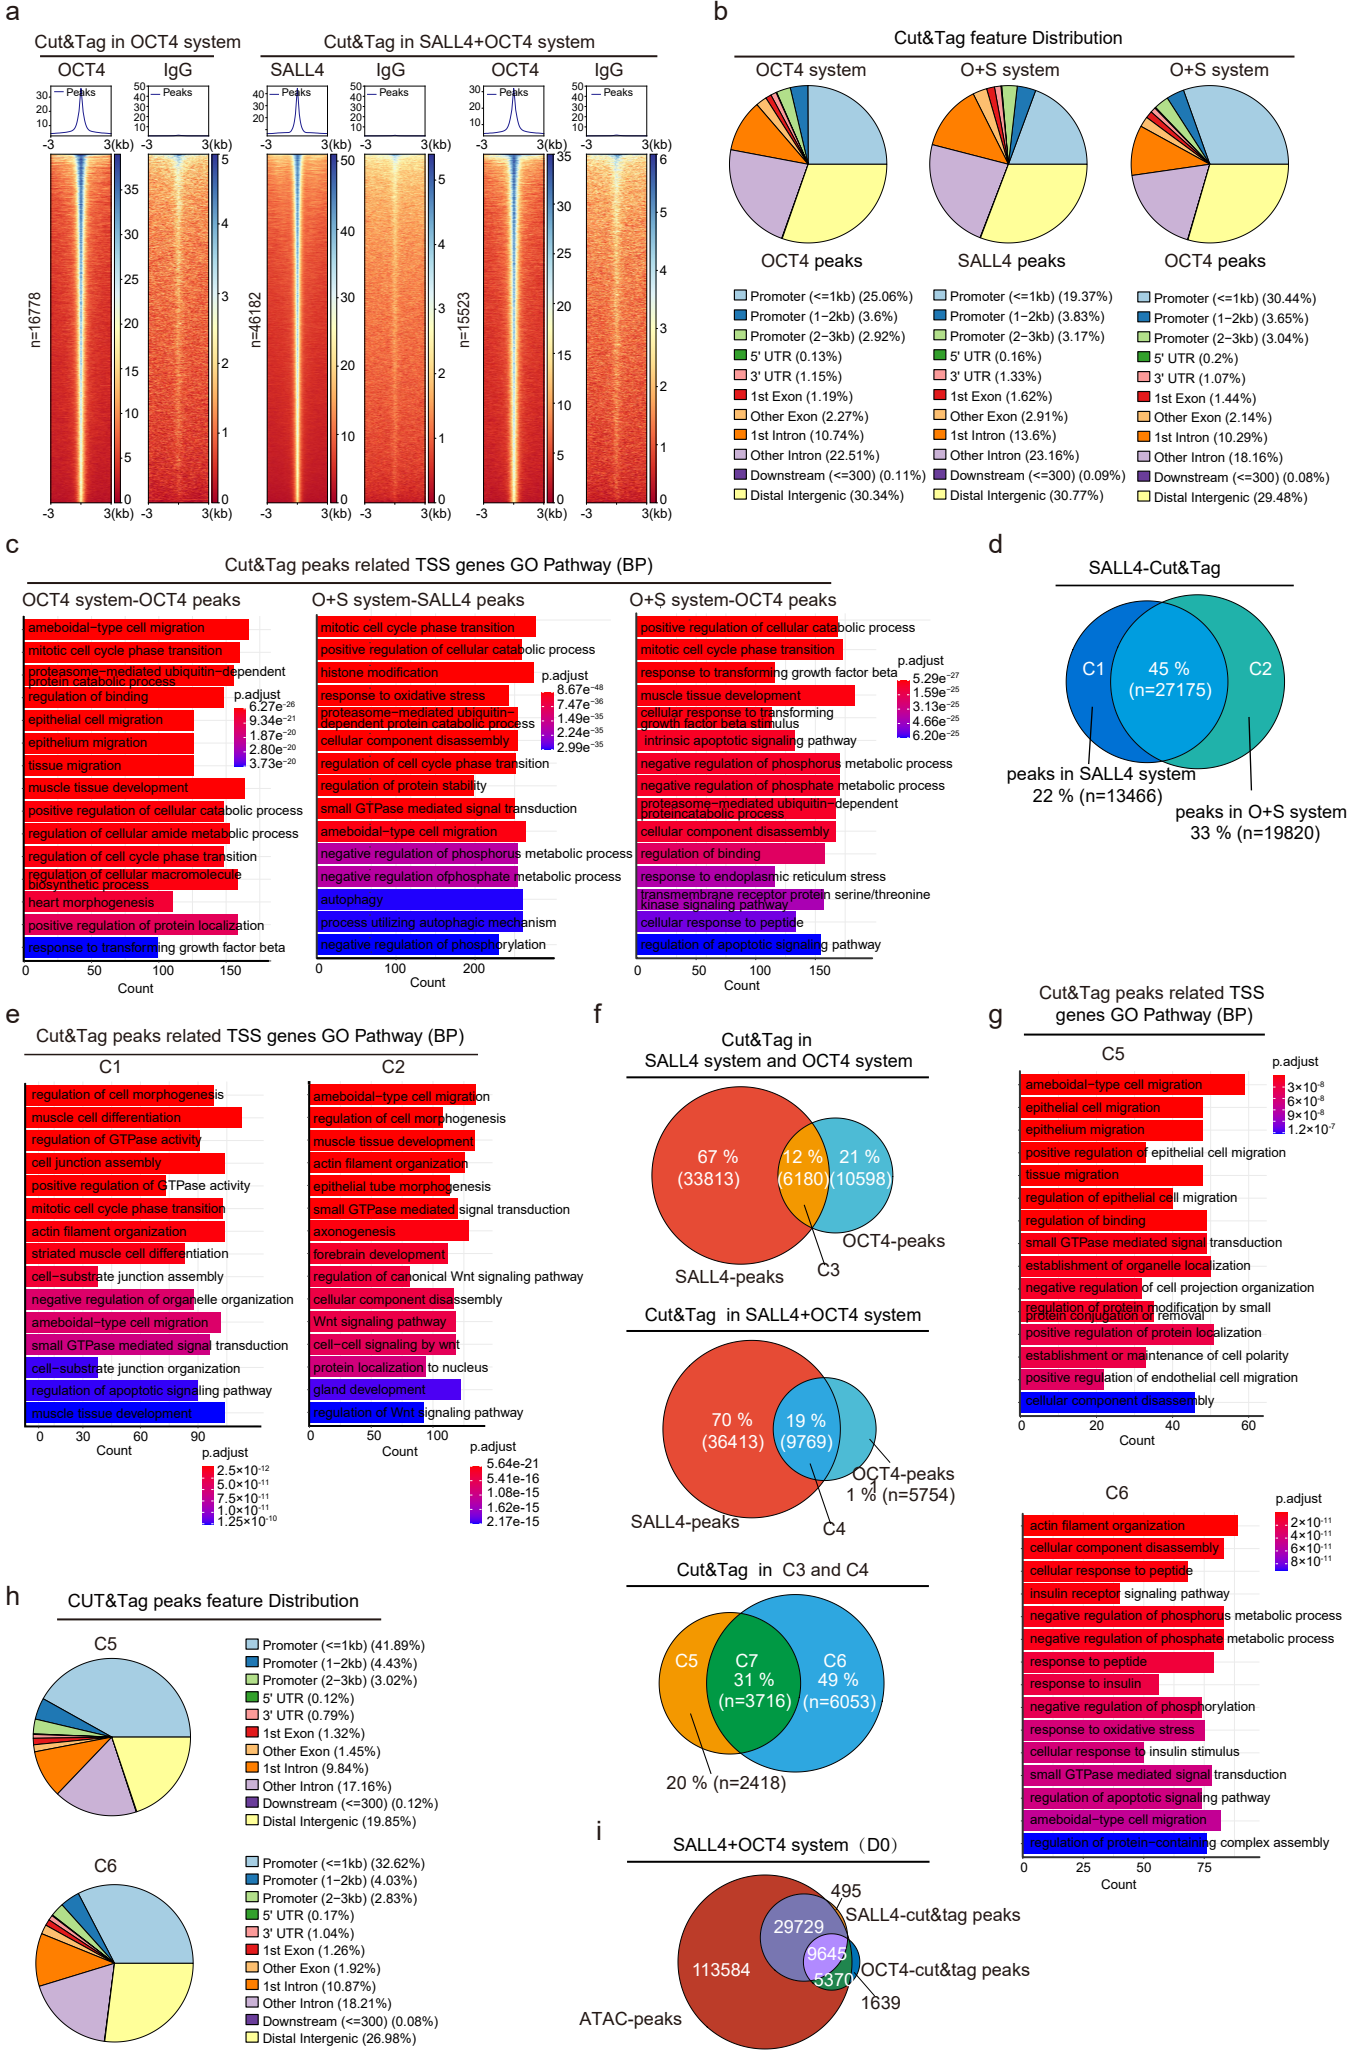

**Supplementary Fig.14 Cut&Tag analysis of SALL4/OCT4 binding site during O+S-mediated iPSCs reprogramming**

**a.** Heatmap of Cut&Tag data at D0 from IgG, OCT4 and SALL4, respectively, showing all binding peaks centred on the peak region within a 3 kb window around the peak. **b.** Genome distribution of the location for SALL4 or OCT4-occupied peaks relative to the nearest annotated gene. O+S, OCT4+SALL4. **c.** GO biological processes analysis for genes near the OCT4-TSS loci binding peaks in OCT4 system (left). GO biological processes analysis for genes near the SALL4 (middle) or OCT4 (right)-TSS loci binding peaks in OCT4+SALL4 system. Statistical analysis for GO was performed using Fisher's exact test, the adjust p value for each term are shown. O+S, OCT4+SALL4. **d.** Venn diagrams shows the overlapping numbers of SALL4 Cut&Tag peaks between SALL4 system and O+S system at day0. O+S, OCT4+SALL4. **e.** Left, GO analysis for genes annotated by Cut&Tag peaks (C1) in Supplementary Fig.14d. Right, GO analysis for genes annotated by Cut&Tag peaks (C2) in Supplementary Fig.14d. Statistical analysis for GO was performed using Fisher's exact test, the adjust p value for each term are shown. **f.** Top, Venn diagrams shows the overlapping numbers between SALL4 binding peaks and OCT4 binding peaks in SALL4 system and OCT4 system. Middle, Venn diagrams shows the overlapping numbers between SALL4 binding peaks and OCT4 binding peaks in O+S system. Bottom, Venn diagrams shows the changes of common binding peaks between the predicted OCT4 and SALL4 common binding peaks (C3 cluster) and the real OCT4 and SALL4 common binding peaks (C4 cluster). **g.** Top, GO analysis for genes annotated by Cut&Tag peaks (C5) in Supplementary Fig.14f. Bottom, GO analysis for genes annotated by Cut&Tag peaks (C6) in Supplementary Fig.14f. Statistical analysis for GO was performed using Fisher's exact test, the adjust p value for each term are shown. **h.** Top, Genome distribution of the location for SALL4 and OCT4-common occupied peaks (C5) in Supplementary Fig.14f relative to the nearest annotated gene. Bottom, Genome distribution of the location for SALL4 and OCT4-common occupied peaks (C6) in Supplementary Fig.14f relative to the nearest annotated gene. **i.** Venn diagrams shows the overlapping numbers between SALL4 Cut&Tag peaks, OCT4 Cut&Tag peaks and ATAC-seq peaks in O+S system at day0.

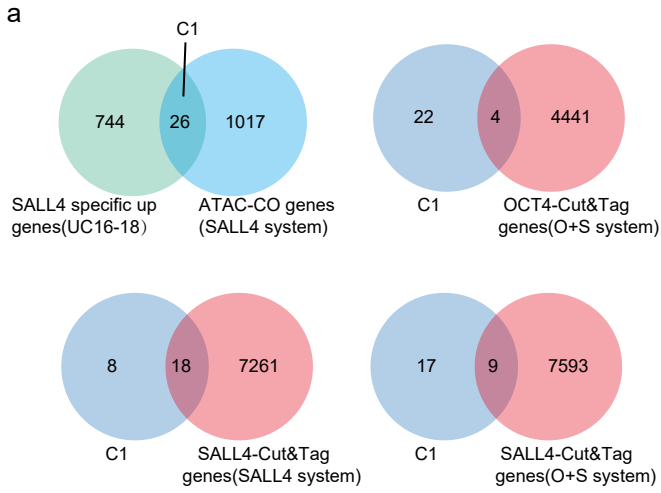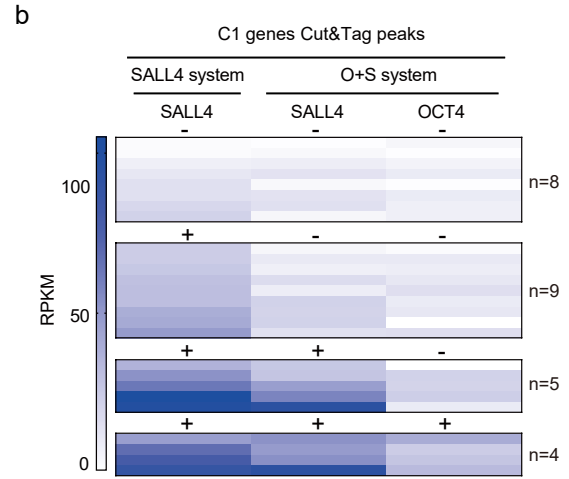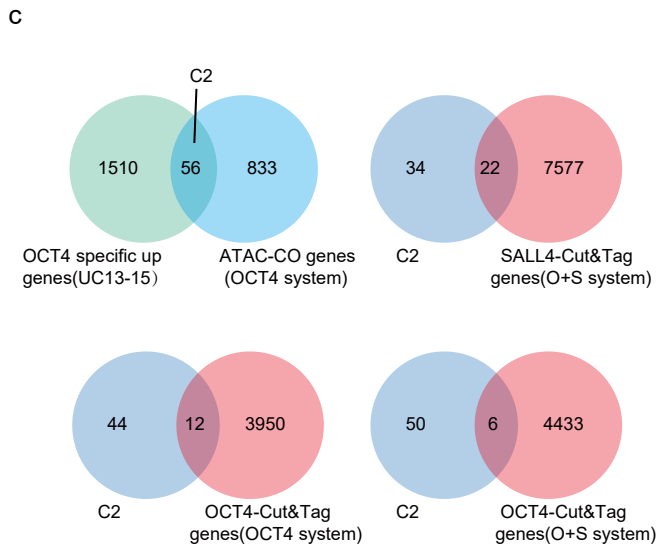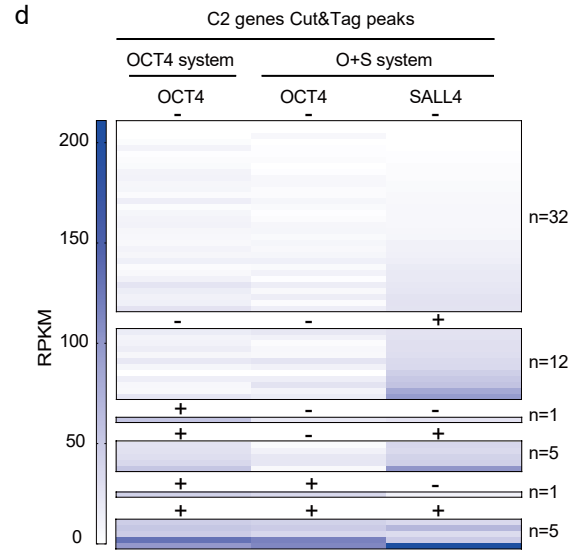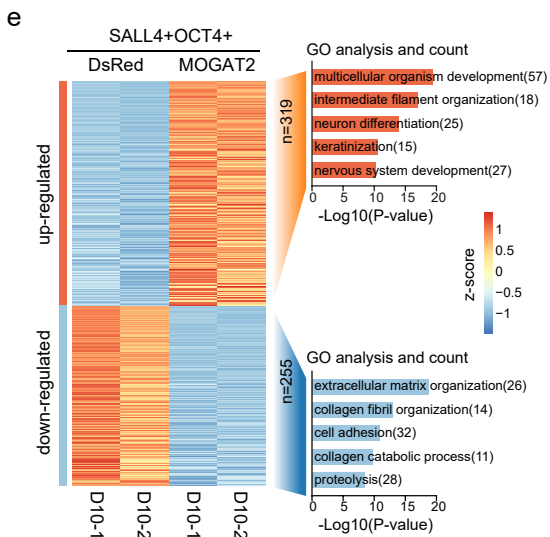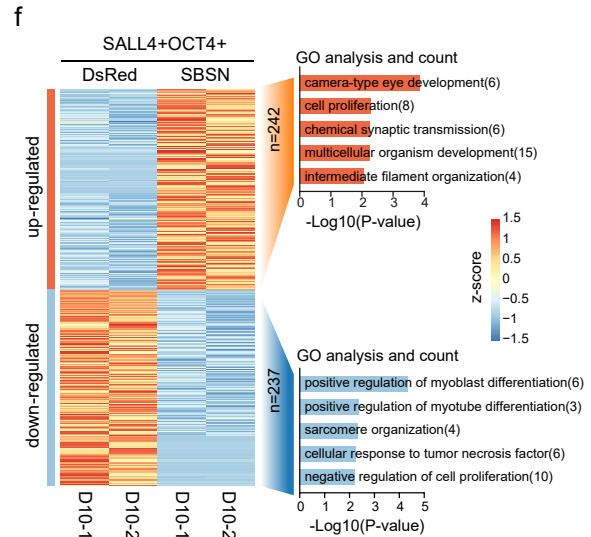

**Supplementary Fig.15 The functions of SALL4-downstream genes in reprogramming**

**a.** Venn diagrams shows the overlapping numbers(C1 subgroup) between SALL4 specific up genes(Fig.4e, UC16-18) and ATAC-CO genes in SALL4 system. The overlapping numbers from the comparison of C1 subgroup genes with the SALL4 or OCT4-binding peaks related genes in SALL4 and O+S system are shown in figure. O+S, OCT4+SALL4. **b.** Heatmap of SALL4 or OCT4-binding peaks enrichment on C1 genes (Supplementary Fig.15a) in SALL4 system and O+S system, respectively. O+S, OCT4+SALL4. +, genes with binding peaks. -, genes without binding peaks. **c.** Venn diagrams shows the overlapping numbers (C2 subgroup) between OCT4 specific up genes (Fig.4e, UC13-15) and ATAC-CO genes in OCT4 system. The overlapping numbers from the comparison of C2 subgroup genes with the SALL4 or OCT4-binding peaks related genes in OCT4 and O+S system are shown in figure. O+S, OCT4+SALL4. **d.** Heatmap of SALL4 or OCT4-binding peaks enrichment on C2 genes (Supplementary Fig.15c) in OCT4 system and O+S system, respectively. O+S, OCT4+SALL4. +, genes with binding peaks. -, genes without binding peaks. **e-f.** Heatmap of differential expression gene analysis for day10 RNA-seq data from SALL4+OCT4+DsRed, SALL4+OCT4+MOGAT2 and SALL4+OCT4+SBSN systems. The 4 subgroups were based on the fold change of gene expression between DsRed and MOGAT2/SBSN. GO analysis for each subgroup are shown. Statistical analysis for GO was performed using Fisher's exact test, the  $-\text{Log}_{10}(\text{p value})$  for each term are shown.

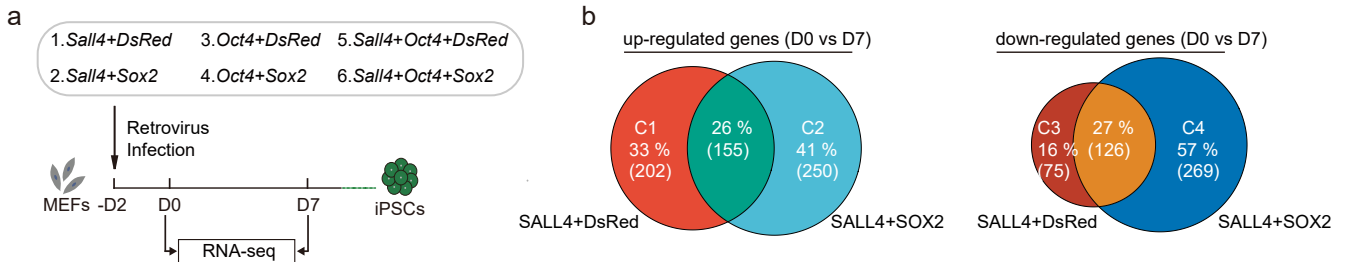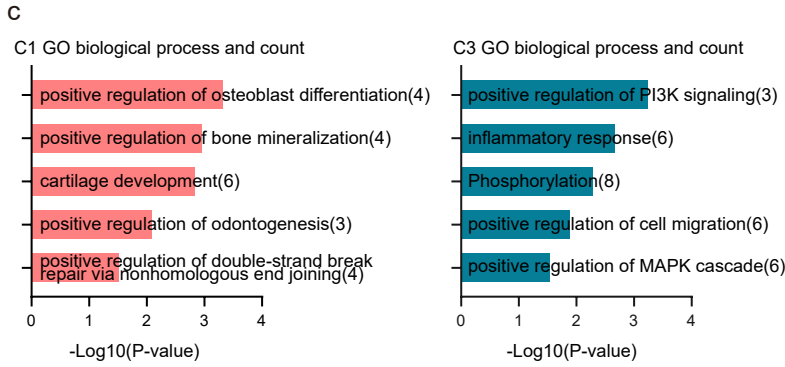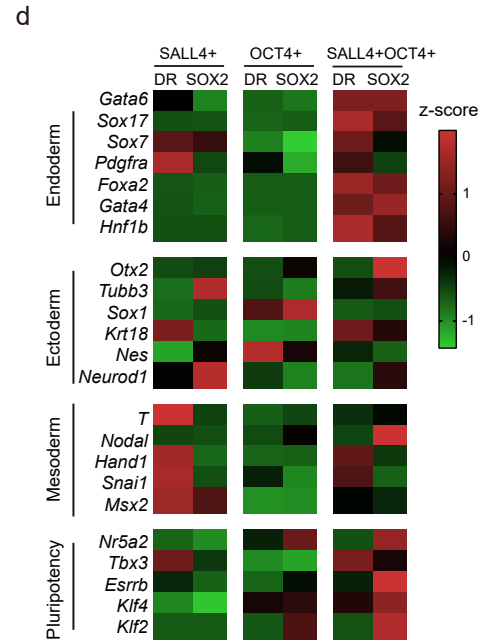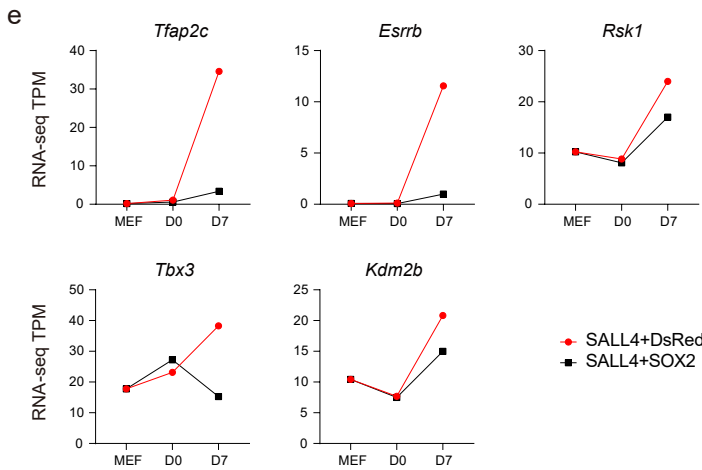

**f**

| Name           | GO term                         |
|----------------|---------------------------------|
| <i>Cebpb</i>   | C/EBP complex                   |
| <i>Map3k20</i> | Serine/threonine-protein kinase |
| <i>Hoxc6</i>   | Transcription regulation        |
| <i>Gmppb</i>   | Nucleotidyltransferase          |

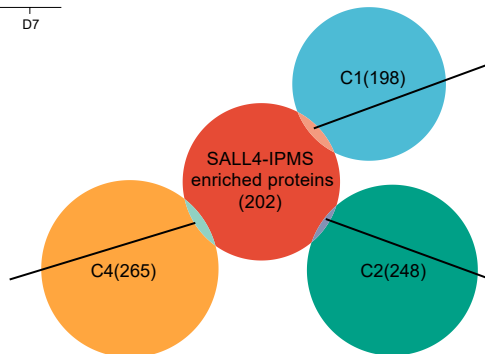

| Name          | GO term                       |
|---------------|-------------------------------|
| <i>Xrcc1</i>  | DNA repair                    |
| <i>Magi3</i>  | ATP-binding                   |
| <i>Nsd2</i>   | Chromatin regulator           |
| <i>Tubb4a</i> | Cilium biogenesis/degradation |

| Name          | GO term                  |
|---------------|--------------------------|
| <i>Ssx2lp</i> | Cell adhesion            |
| <i>Wwc1</i>   | Transcription regulation |



**Supplementary Fig.16 SOX2 have a opposite effect in SALL4-reprogramming and OCT4-reprogramming**

**a.** Diagram for RNA-seq data collecting during Sox2 related reprogramming process. **b.** Venn diagrams shows the number of differential expression genes in Sox2 related reprogramming process. **c.** Left, GO analysis for genes specific-upregulated in SALL4+DsRed group (C1) in Supplementary Fig.16b. Right, GO analysis for genes specific-downregulated in SALL4+DsRed group (C3) in Supplementary Fig.16b. Statistical analysis for GO was performed using Fisher's exact test, the  $-\text{Log}_{10}(\text{p value})$  for each term are shown. **d.** Heatmap showing expression of master regulator genes for each of the three primary germ layers at day7. DR, DsRed. **e.** RNA-seq data shows the expression of representative reprogramming promoting genes in SALL4+DsRed and SALL4+SOX2 condition.  $n = 1$  samples for each time point from 1 independent experiments. **f.** Venn diagrams shows the overlapping genes between SALL4 enriched proteins and SOX2-regulated differential expression genes in Supplementary Fig.16b.

Supplementary Table 1. List of primer sequences for PCR, qRT-PCR and shRNA.

|                            |                           |
|----------------------------|---------------------------|
| <b>qPCR Primer (5'-3')</b> |                           |
| Endo-Oct4-F                | TAGGTGAGCCGTCTTTCCAC      |
| Endo-Oct4-R                | GCTTAGCCAGGTTTCGAGGAT     |
| Endo-Sox2-F                | AGGGCTGGGAGAAAGAAGAG      |
| Endo-Sox2-R                | CCGCGATTGTTGTGATTAGT      |
| Endo-Sall4-F               | CGAAGGGGGCTAAAATTTCCCA    |
| Endo-Sall4-R               | TGGCCCTCCTCCCAGTTGAT      |
| Endo-Nanog-F               | AAATCCCTTCCCTCGCCATC      |
| Endo-Nanog-R               | GCGTTCCCAGAATTCGATGC      |
| Endo-Rex1-F                | CCCTCGACAGACTGACCCTAA     |
| Endo-Rex1-R                | TCGGGGCTAATCTCACTTTCAT    |
| Endo-Esrrb-F               | GGGATGCTGAAGGAAGGTGT      |
| Endo-Esrrb-R               | TTAGCAGGTGGGGAAATCG       |
| Endo-Nr5a2-F               | TCTGAGCCATGTAGCCTTGC      |
| Endo-Nr5a2-R               | GGAAAGTGACCATAGGGTTGGTA   |
| Exo-PF                     | GGGTGGACCATCCTCTAGAC      |
| Exo-Sall4-R                | GCAGTTCCCAGGGGAGTTCAC     |
| Exo-Oct4-R                 | AGCTGATTGGCGATGTGAGT      |
|                            |                           |
| <b>PCR Primer (5'-3')</b>  |                           |
| Sall4-PF                   | GGGTGGACCATCCTCTAGAC      |
| Sall4-PR                   | GATGGCTGGGTAGCCTCTGTC     |
| Oct4-PF                    | TTAAGGATCCATGGCTGGACACCTG |
| Oct4-PR                    | TGGTACGCGTGTTTGAATGCATGGG |
|                            |                           |
| <b>shRNA (5'-3')</b>       |                           |
| shTfap2c-1                 | GCACTTGCTCCTACACGATCA     |
| shTfap2c-2                 | GCGGTGGCTGACTATTTAACG     |
| shEsrrb-1                  | GATTCGATGTACATTGAGA       |
| shEsrrb-2                  | GGATGGAGATTCTCATCTTGG     |
| shRsk1-1                   | GCTCTATCTTATTCTGGACTT     |
| shRsk1-2                   | CTACATACTCTGCTCTCAATA     |
